# Supplementary material for: Knowledge-guided gene prioritization reveals new insights into the mechanisms of chemoresistance
Source: Genome Biol. 2017 Aug 11;18:153. doi: 10.1186/s13059-017-1282-3 (PMC5554409; doi:10.1186/s13059-017-1282-3)
Supplement: Supplementary file 5 — List of 137 genes that were among the top 500 Robust-ProGENI-identified genes for at least 40 (over a quarter of 139 studied) treatments in the GDSC dataset (sheet 1). Also includes pathway and Gene Ontology enrichment analysis results of this set (sheet 2). (XLSX 126 kb) [file 13059_2017_1282_MOESM5_ESM.xlsx]

## Sheet: List_core_genes
Ensembl ID	Gene Symbol	Number of drugs
ENSG00000100852	ARHGAP5	88
ENSG00000089159	PXN	83
ENSG00000160691	SHC1	73
ENSG00000150093	ITGB1	72
ENSG00000169398	PTK2	70
ENSG00000161638	ITGA5	67
ENSG00000091409	ITGA6	67
ENSG00000115221	ITGB6	62
ENSG00000026508	CD44	62
ENSG00000197122	SRC	62
ENSG00000138448	ITGAV	62
ENSG00000102554	KLF5	60
ENSG00000173334	TRIB1	60
ENSG00000011422	PLAUR	59
ENSG00000087245	MMP2	59
ENSG00000082781	ITGB5	59
ENSG00000049323	LTBP1	59
ENSG00000118785	SPP1	58
ENSG00000005884	ITGA3	58
ENSG00000135424	ITGA7	57
ENSG00000108679	LGALS3BP	56
ENSG00000132589	FLOT2	56
ENSG00000116962	NID1	56
ENSG00000182871	COL18A1	55
ENSG00000164305	CASP3	54
ENSG00000167772	ANGPTL4	54
ENSG00000153071	DAB2	53
ENSG00000163513	TGFBR2	53
ENSG00000145715	RASA1	53
ENSG00000105855	ITGB8	53
ENSG00000005961	ITGA2B	53
ENSG00000135218	CD36	52
ENSG00000143127	ITGA10	52
ENSG00000142949	PTPRF	52
ENSG00000162407	PPAP2B	52
ENSG00000180370	PAK2	52
ENSG00000196396	PTPN1	52
ENSG00000109072	VTN	52
ENSG00000103653	CSK	52
ENSG00000115884	SDC1	51
ENSG00000132855	ANGPTL3	51
ENSG00000175591	P2RY2	51
ENSG00000198959	TGM2	51
ENSG00000179218	CALR	51
ENSG00000105329	TGFB1	51
ENSG00000130402	ACTN4	51
ENSG00000137801	THBS1	50
ENSG00000168056	LTBP3	50
ENSG00000169439	SDC2	50
ENSG00000142871	CYR61	50
ENSG00000140682	TGFB1I1	50
ENSG00000106991	ENG	50
ENSG00000115325	DOK1	50
ENSG00000144668	ITGA9	50
ENSG00000113140	SPARC	49
ENSG00000106799	TGFBR1	49
ENSG00000138685	FGF2	49
ENSG00000085117	CD82	49
ENSG00000010278	CD9	48
ENSG00000078061	ARAF	48
ENSG00000135404	CD63	48
ENSG00000122861	PLAU	48
ENSG00000118523	CTGF	48
ENSG00000139567	ACVRL1	47
ENSG00000092969	TGFB2	47
ENSG00000151694	ADAM17	47
ENSG00000105974	CAV1	47
ENSG00000104368	PLAT	47
ENSG00000146674	IGFBP3	47
ENSG00000115504	EHBP1	47
ENSG00000037280	FLT4	46
ENSG00000100201	DDX17	46
ENSG00000177697	CD151	46
ENSG00000122194	PLG	46
ENSG00000162512	SDC3	46
ENSG00000113905	HRG	46
ENSG00000115091	ACTR3	46
ENSG00000168615	ADAM9	45
ENSG00000181104	F2R	45
ENSG00000140416	TPM1	45
ENSG00000019991	HGF	45
ENSG00000142627	EPHA2	45
ENSG00000113721	PDGFRB	45
ENSG00000163520	FBLN2	45
ENSG00000135919	SERPINE2	45
ENSG00000123159	GIPC1	45
ENSG00000214063	TSPAN4	45
ENSG00000053747	LAMA3	44
ENSG00000100823	APEX1	44
ENSG00000164171	ITGA2	44
ENSG00000101224	CDC25B	44
ENSG00000125482	TTF1	44
ENSG00000135047	CTSL	44
ENSG00000136999	NOV	44
ENSG00000137076	TLN1	44
ENSG00000136238	RAC1	43
ENSG00000157227	MMP14	43
ENSG00000122729	ACO1	43
ENSG00000115641	FHL2	43
ENSG00000078081	LAMP3	43
ENSG00000149177	PTPRJ	43
ENSG00000137673	MMP7	43
ENSG00000154229	PRKCA	42
ENSG00000101665	SMAD7	42
ENSG00000121769	FABP3	42
ENSG00000127995	CASD1	42
ENSG00000136205	TNS3	42
ENSG00000115414	FN1	42
ENSG00000123384	LRP1	42
ENSG00000141736	ERBB2	42
ENSG00000091136	LAMB1	42
ENSG00000145431	PDGFC	42
ENSG00000163347	CLDN1	42
ENSG00000069702	TGFBR3	42
ENSG00000008516	MMP25	41
ENSG00000081479	LRP2	41
ENSG00000101680	LAMA1	41
ENSG00000138071	ACTR2	41
ENSG00000100985	MMP9	41
ENSG00000158458	NRG2	41
ENSG00000154016	GRAP	41
ENSG00000197632	SERPINB2	41
ENSG00000171223	JUNB	41
ENSG00000139329	LUM	41
ENSG00000152377	SPOCK1	41
ENSG00000128052	KDR	41
ENSG00000135596	MICAL1	41
ENSG00000077943	ITGA8	41
ENSG00000107957	SH3PXD2A	41
ENSG00000137309	HMGA1	41
ENSG00000177606	JUN	40
ENSG00000139626	ITGB7	40
ENSG00000168702	LRP1B	40
ENSG00000167004	PDIA3	40
ENSG00000167460	TPM4	40
ENSG00000127947	PTPN12	40
ENSG00000138032	PPM1B	40

## Sheet: Enrichment_analysis_core_genes
Category	Term	Count	%	PValue	Genes	List Total	Pop Hits	Pop Total	Fold Enrichment	Bonferroni	Benjamini	FDR
GOTERM_CC_FAT	GO:0005886~plasma membrane	76	55.4745	3.19337e-11	ENSG00000105974, ENSG00000138448, ENSG00000101665, ENSG00000179218, ENSG00000162407, ENSG00000115414, ENSG00000181104, ENSG00000037280, ENSG00000089159, ENSG00000135404, ENSG00000214063, ENSG00000161638, ENSG00000168615, ENSG00000169439, ENSG00000091136, ENSG00000158458, ENSG00000005884, ENSG00000163513, ENSG00000115641, ENSG00000139567, ENSG00000139626, ENSG00000077943, ENSG00000106991, ENSG0000…	132	3777	12782	1.94846	6.83381e-09	4.27113e-10	4.04687e-08
GOTERM_CC_FAT	GO:0044459~plasma membrane part	66	48.1752	1.0199e-17	ENSG00000105974, ENSG00000138448, ENSG00000179218, ENSG00000101665, ENSG00000115414, ENSG00000181104, ENSG00000037280, ENSG00000135404, ENSG00000089159, ENSG00000214063, ENSG00000161638, ENSG00000168615, ENSG00000091136, ENSG00000169439, ENSG00000005884, ENSG00000163513, ENSG00000115641, ENSG00000139567, ENSG00000077943, ENSG00000139626, ENSG00000106991, ENSG00000157227, ENSG00000053747, ENSG0000…	132	2203	12782	2.90104	2.18259e-15	1.0913e-15	1.2925e-14
GOTERM_BP_FAT	GO:0007166~cell surface receptor linked signal transduction	54	39.4161	1.37877e-14	ENSG00000138448, ENSG00000101665, ENSG00000181104, ENSG00000089159, ENSG00000037280, ENSG00000168615, ENSG00000161638, ENSG00000005884, ENSG00000163513, ENSG00000139567, ENSG00000077943, ENSG00000139626, ENSG00000106991, ENSG00000198959, ENSG00000053747, ENSG00000069702, ENSG00000164171, ENSG00000091409, ENSG00000104368, ENSG00000115325, ENSG00000168056, ENSG00000105329, ENSG00000140682, ENSG0000…	130	1856	13528	3.02765	2.44635e-11	1.16496e-12	2.3348e-11
GOTERM_CC_FAT	GO:0005576~extracellular region	51	37.2263	3.40981e-10	ENSG00000049323, ENSG00000179218, ENSG00000182871, ENSG00000113905, ENSG00000139329, ENSG00000137673, ENSG00000115414, ENSG00000109072, ENSG00000181104, ENSG00000167772, ENSG00000168615, ENSG00000142871, ENSG00000118785, ENSG00000091136, ENSG00000158458, ENSG00000106991, ENSG00000146674, ENSG00000157227, ENSG00000197632, ENSG00000053747, ENSG00000069702, ENSG00000108679, ENSG00000011422, ENSG0000…	132	2010	12782	2.45697	7.29698e-08	4.05388e-09	4.32116e-07
GOTERM_BP_FAT	GO:0022610~biological adhesion	45	32.8467	6.94377e-25	ENSG00000135218, ENSG00000138448, ENSG00000140682, ENSG00000182871, ENSG00000197122, ENSG00000105855, ENSG00000115221, ENSG00000142949, ENSG00000115414, ENSG00000026508, ENSG00000143127, ENSG00000109072, ENSG00000162512, ENSG00000137801, ENSG00000005961, ENSG00000118523, ENSG00000116962, ENSG00000082781, ENSG00000101680, ENSG00000089159, ENSG00000118785, ENSG00000168615, ENSG00000161638, ENSG0000…	130	701	13528	6.68013	1.23391e-21	4.11303e-22	1.17737e-21
GOTERM_BP_FAT	GO:0007155~cell adhesion	45	32.8467	6.55134e-25	ENSG00000135218, ENSG00000138448, ENSG00000140682, ENSG00000182871, ENSG00000197122, ENSG00000105855, ENSG00000115221, ENSG00000142949, ENSG00000115414, ENSG00000026508, ENSG00000143127, ENSG00000109072, ENSG00000162512, ENSG00000137801, ENSG00000005961, ENSG00000118523, ENSG00000116962, ENSG00000082781, ENSG00000101680, ENSG00000089159, ENSG00000118785, ENSG00000168615, ENSG00000161638, ENSG0000…	130	700	13528	6.68967	1.16417e-21	5.82086e-22	1.11083e-21
GOTERM_BP_FAT	GO:0042127~regulation of cell proliferation	43	31.3869	5.42169e-21	ENSG00000105974, ENSG00000103653, ENSG00000179218, ENSG00000140682, ENSG00000105329, ENSG00000122861, ENSG00000113721, ENSG00000182871, ENSG00000113140, ENSG00000106799, ENSG00000092969, ENSG00000142949, ENSG00000102554, ENSG00000137673, ENSG00000145431, ENSG00000177606, ENSG00000121769, ENSG00000136205, ENSG00000137801, ENSG00000181104, ENSG00000101680, ENSG00000101224, ENSG00000037280, ENSG0000…	130	787	13528	5.6857	9.63434e-18	7.41103e-19	9.19292e-18
GOTERM_CC_FAT	GO:0031226~intrinsic to plasma membrane	43	31.3869	5.13733e-13	ENSG00000135218, ENSG00000105974, ENSG00000138448, ENSG00000113721, ENSG00000115884, ENSG00000105855, ENSG00000115221, ENSG00000106799, ENSG00000142949, ENSG00000149177, ENSG00000026508, ENSG00000143127, ENSG00000005961, ENSG00000181104, ENSG00000082781, ENSG00000135404, ENSG00000037280, ENSG00000214063, ENSG00000135424, ENSG00000168615, ENSG00000161638, ENSG00000151694, ENSG00000010278, ENSG0000…	132	1215	12782	3.42702	1.09932e-10	1.37415e-11	6.51001e-10
GOTERM_CC_FAT	GO:0005887~integral to plasma membrane	42	30.6569	1.13655e-12	ENSG00000135218, ENSG00000105974, ENSG00000138448, ENSG00000113721, ENSG00000115884, ENSG00000105855, ENSG00000115221, ENSG00000106799, ENSG00000142949, ENSG00000149177, ENSG00000026508, ENSG00000143127, ENSG00000005961, ENSG00000181104, ENSG00000082781, ENSG00000135404, ENSG00000037280, ENSG00000214063, ENSG00000135424, ENSG00000161638, ENSG00000151694, ENSG00000010278, ENSG00000169439, ENSG0000…	132	1188	12782	3.4234	2.43219e-10	2.70243e-11	1.4403e-09
KEGG_PATHWAY	hsa04510:Focal adhesion	40	29.1971	4.81941e-31	ENSG00000105974, ENSG00000138448, ENSG00000113721, ENSG00000197122, ENSG00000105855, ENSG00000115221, ENSG00000130402, ENSG00000115414, ENSG00000145431, ENSG00000177606, ENSG00000143127, ENSG00000109072, ENSG00000137801, ENSG00000005961, ENSG00000082781, ENSG00000101680, ENSG00000089159, ENSG00000037280, ENSG00000118785, ENSG00000161638, ENSG00000135424, ENSG00000141736, ENSG00000091136, ENSG0000…	96	201	5085	10.541	3.80734e-29	3.80734e-29	5.11082e-28
GOTERM_CC_FAT	GO:0044421~extracellular region part	39	28.4672	1.47317e-13	ENSG00000104368, ENSG00000008516, ENSG00000049323, ENSG00000179218, ENSG00000105329, ENSG00000182871, ENSG00000113140, ENSG00000136999, ENSG00000092969, ENSG00000100985, ENSG00000139329, ENSG00000087245, ENSG00000137673, ENSG00000145431, ENSG00000115414, ENSG00000026508, ENSG00000109072, ENSG00000137801, ENSG00000118523, ENSG00000116962, ENSG00000167772, ENSG00000101680, ENSG00000163520, ENSG0000…	132	960	12782	3.93385	3.15279e-11	5.25469e-12	1.86706e-10
GOTERM_BP_FAT	GO:0006928~cell motion	38	27.7372	5.22714e-24	ENSG00000104368, ENSG00000105329, ENSG00000122861, ENSG00000162407, ENSG00000113721, ENSG00000138071, ENSG00000197122, ENSG00000123159, ENSG00000106799, ENSG00000115091, ENSG00000092969, ENSG00000115414, ENSG00000026508, ENSG00000136205, ENSG00000137801, ENSG00000118523, ENSG00000101680, ENSG00000161638, ENSG00000151694, ENSG00000010278, ENSG00000141736, ENSG00000167460, ENSG00000150093, ENSG0000…	130	475	13528	8.32492	9.28863e-21	1.5481e-21	8.86304e-21
GOTERM_BP_FAT	GO:0006793~phosphorus metabolic process	32	23.3577	1.57725e-09	ENSG00000103653, ENSG00000101665, ENSG00000105329, ENSG00000113721, ENSG00000078061, ENSG00000138032, ENSG00000197122, ENSG00000106799, ENSG00000092969, ENSG00000142949, ENSG00000149177, ENSG00000137801, ENSG00000181104, ENSG00000101224, ENSG00000037280, ENSG00000196396, ENSG00000168615, ENSG00000127947, ENSG00000141736, ENSG00000163513, ENSG00000160691, ENSG00000139567, ENSG00000128052, ENSG0000…	130	973	13528	3.42237	2.80276e-06	7.00692e-08	2.67435e-06
GOTERM_BP_FAT	GO:0006796~phosphate metabolic process	32	23.3577	1.57725e-09	ENSG00000103653, ENSG00000101665, ENSG00000105329, ENSG00000113721, ENSG00000078061, ENSG00000138032, ENSG00000197122, ENSG00000106799, ENSG00000092969, ENSG00000142949, ENSG00000149177, ENSG00000137801, ENSG00000181104, ENSG00000101224, ENSG00000037280, ENSG00000196396, ENSG00000168615, ENSG00000127947, ENSG00000141736, ENSG00000163513, ENSG00000160691, ENSG00000139567, ENSG00000128052, ENSG0000…	130	973	13528	3.42237	2.80276e-06	7.00692e-08	2.67435e-06
GOTERM_BP_FAT	GO:0001944~vasculature development	31	22.6277	7.47934e-25	ENSG00000104368, ENSG00000105974, ENSG00000138448, ENSG00000101665, ENSG00000122861, ENSG00000162407, ENSG00000182871, ENSG00000171223, ENSG00000106799, ENSG00000092969, ENSG00000149177, ENSG00000102554, ENSG00000087245, ENSG00000177606, ENSG00000026508, ENSG00000137801, ENSG00000118523, ENSG00000167772, ENSG00000142871, ENSG00000135424, ENSG00000163513, ENSG00000139567, ENSG00000128052, ENSG0000…	130	251	13528	12.8522	1.32908e-21	3.3227e-22	1.26818e-21
GOTERM_BP_FAT	GO:0001568~blood vessel development	31	22.6277	3.61487e-25	ENSG00000104368, ENSG00000105974, ENSG00000138448, ENSG00000101665, ENSG00000122861, ENSG00000162407, ENSG00000182871, ENSG00000171223, ENSG00000106799, ENSG00000092969, ENSG00000149177, ENSG00000102554, ENSG00000087245, ENSG00000177606, ENSG00000026508, ENSG00000137801, ENSG00000118523, ENSG00000167772, ENSG00000142871, ENSG00000135424, ENSG00000163513, ENSG00000139567, ENSG00000128052, ENSG0000…	130	245	13528	13.167	6.42363e-22	6.42363e-22	6.12932e-22
GOTERM_BP_FAT	GO:0007167~enzyme linked receptor protein signaling pathway	31	22.6277	6.64736e-21	ENSG00000104368, ENSG00000115325, ENSG00000168056, ENSG00000101665, ENSG00000140682, ENSG00000105329, ENSG00000113721, ENSG00000197122, ENSG00000106799, ENSG00000092969, ENSG00000142949, ENSG00000149177, ENSG00000145431, ENSG00000177606, ENSG00000118523, ENSG00000089159, ENSG00000037280, ENSG00000196396, ENSG00000168615, ENSG00000151694, ENSG00000141736, ENSG00000163513, ENSG00000160691, ENSG0000…	130	342	13528	9.43248	1.18124e-17	8.4374e-19	1.12711e-17
GOTERM_MF_FAT	GO:0005509~calcium ion binding	31	22.6277	2.03244e-09	ENSG00000168056, ENSG00000138448, ENSG00000008516, ENSG00000049323, ENSG00000179218, ENSG00000113140, ENSG00000168702, ENSG00000100985, ENSG00000130402, ENSG00000087245, ENSG00000137673, ENSG00000143127, ENSG00000137801, ENSG00000005961, ENSG00000116962, ENSG00000163520, ENSG00000161638, ENSG00000135424, ENSG00000167460, ENSG00000005884, ENSG00000077943, ENSG00000157227, ENSG00000198959, ENSG0000…	126	919	12983	3.47577	6.32088e-07	9.02984e-08	2.73086e-06
GOTERM_BP_FAT	GO:0009611~response to wounding	29	21.1679	8.59991e-14	ENSG00000104368, ENSG00000135218, ENSG00000163513, ENSG00000008516, ENSG00000139567, ENSG00000105329, ENSG00000122861, ENSG00000106991, ENSG00000164305, ENSG00000115884, ENSG00000115221, ENSG00000092969, ENSG00000197632, ENSG00000122194, ENSG00000115414, ENSG00000026508, ENSG00000011422, ENSG00000137801, ENSG00000181104, ENSG00000118523, ENSG00000138685, ENSG00000140416, ENSG00000118785, ENSG0000…	130	530	13528	5.69393	1.52897e-10	6.64768e-12	1.45894e-10
GOTERM_BP_FAT	GO:0007242~intracellular signaling cascade	29	21.1679	1.58226e-05	ENSG00000135218, ENSG00000115325, ENSG00000103653, ENSG00000105974, ENSG00000101665, ENSG00000179218, ENSG00000140682, ENSG00000078061, ENSG00000197122, ENSG00000106799, ENSG00000136205, ENSG00000137801, ENSG00000181104, ENSG00000118523, ENSG00000168615, ENSG00000141736, ENSG00000160691, ENSG00000115641, ENSG00000100852, ENSG00000175591, ENSG00000198959, ENSG00000173334, ENSG00000019991, ENSG0000…	130	1256	13528	2.40269	0.0277254	0.000267746	0.0268252
GOTERM_BP_FAT	GO:0051270~regulation of cell motion	28	20.438	2.99268e-24	ENSG00000101665, ENSG00000105329, ENSG00000113721, ENSG00000182871, ENSG00000092969, ENSG00000106799, ENSG00000100985, ENSG00000130402, ENSG00000137801, ENSG00000181104, ENSG00000101680, ENSG00000168615, ENSG00000151694, ENSG00000091136, ENSG00000100852, ENSG00000139567, ENSG00000128052, ENSG00000146674, ENSG00000053747, ENSG00000173334, ENSG00000122194, ENSG00000069702, ENSG00000138685, ENSG0000…	130	193	13528	15.097	5.318e-21	1.0636e-21	5.07434e-21
GOTERM_BP_FAT	GO:0016477~cell migration	28	20.438	4.47425e-20	ENSG00000104368, ENSG00000105329, ENSG00000122861, ENSG00000162407, ENSG00000113721, ENSG00000197122, ENSG00000123159, ENSG00000092969, ENSG00000106799, ENSG00000115414, ENSG00000026508, ENSG00000136205, ENSG00000137801, ENSG00000118523, ENSG00000101680, ENSG00000161638, ENSG00000151694, ENSG00000150093, ENSG00000139567, ENSG00000128052, ENSG00000106991, ENSG00000157227, ENSG00000069702, ENSG0000…	130	276	13528	10.557	7.95074e-17	4.96921e-18	7.58646e-17
GOTERM_BP_FAT	GO:0048870~cell motility	28	20.438	7.14788e-19	ENSG00000104368, ENSG00000105329, ENSG00000122861, ENSG00000162407, ENSG00000113721, ENSG00000197122, ENSG00000123159, ENSG00000092969, ENSG00000106799, ENSG00000115414, ENSG00000026508, ENSG00000136205, ENSG00000137801, ENSG00000118523, ENSG00000101680, ENSG00000161638, ENSG00000151694, ENSG00000150093, ENSG00000139567, ENSG00000128052, ENSG00000106991, ENSG00000157227, ENSG00000069702, ENSG0000…	130	307	13528	9.49095	1.27018e-15	7.47164e-17	1.21198e-15
GOTERM_BP_FAT	GO:0051674~localization of cell	28	20.438	7.14788e-19	ENSG00000104368, ENSG00000105329, ENSG00000122861, ENSG00000162407, ENSG00000113721, ENSG00000197122, ENSG00000123159, ENSG00000092969, ENSG00000106799, ENSG00000115414, ENSG00000026508, ENSG00000136205, ENSG00000137801, ENSG00000118523, ENSG00000101680, ENSG00000161638, ENSG00000151694, ENSG00000150093, ENSG00000139567, ENSG00000128052, ENSG00000106991, ENSG00000157227, ENSG00000069702, ENSG0000…	130	307	13528	9.49095	1.27018e-15	7.47164e-17	1.21198e-15
GOTERM_BP_FAT	GO:0010033~response to organic substance	28	20.438	6.97382e-10	ENSG00000105974, ENSG00000105329, ENSG00000115884, ENSG00000197122, ENSG00000171223, ENSG00000092969, ENSG00000115091, ENSG00000106799, ENSG00000177606, ENSG00000026508, ENSG00000121769, ENSG00000137801, ENSG00000181104, ENSG00000196396, ENSG00000168615, ENSG00000142871, ENSG00000118785, ENSG00000151694, ENSG00000141736, ENSG00000163513, ENSG00000160691, ENSG00000115641, ENSG00000164305, ENSG0000…	130	721	13528	4.04122	1.23925e-06	3.34932e-08	1.18247e-06
GOTERM_BP_FAT	GO:0043067~regulation of programmed cell death	28	20.438	9.10337e-09	ENSG00000179218, ENSG00000105329, ENSG00000182871, ENSG00000197122, ENSG00000092969, ENSG00000106799, ENSG00000142949, ENSG00000100985, ENSG00000130402, ENSG00000177606, ENSG00000026508, ENSG00000137801, ENSG00000167004, ENSG00000181104, ENSG00000167772, ENSG00000168615, ENSG00000151694, ENSG00000141736, ENSG00000164305, ENSG00000146674, ENSG00000198959, ENSG00000197632, ENSG00000122194, ENSG0000…	130	812	13528	3.58833	1.61766e-05	3.1109e-07	1.54355e-05
GOTERM_BP_FAT	GO:0010941~regulation of cell death	28	20.438	9.8437e-09	ENSG00000179218, ENSG00000105329, ENSG00000182871, ENSG00000197122, ENSG00000092969, ENSG00000106799, ENSG00000142949, ENSG00000100985, ENSG00000130402, ENSG00000177606, ENSG00000026508, ENSG00000137801, ENSG00000167004, ENSG00000181104, ENSG00000167772, ENSG00000168615, ENSG00000151694, ENSG00000141736, ENSG00000164305, ENSG00000146674, ENSG00000198959, ENSG00000197632, ENSG00000122194, ENSG0000…	130	815	13528	3.57512	1.74921e-05	3.30042e-07	1.66908e-05
KEGG_PATHWAY	hsa04512:ECM-receptor interaction	27	19.708	4.37248e-26	ENSG00000135218, ENSG00000138448, ENSG00000115884, ENSG00000115221, ENSG00000105855, ENSG00000115414, ENSG00000026508, ENSG00000143127, ENSG00000109072, ENSG00000162512, ENSG00000137801, ENSG00000005961, ENSG00000101680, ENSG00000082781, ENSG00000161638, ENSG00000135424, ENSG00000118785, ENSG00000091136, ENSG00000169439, ENSG00000005884, ENSG00000150093, ENSG00000139626, ENSG00000077943, ENSG0000…	96	84	5085	17.0257	3.45426e-24	1.72713e-24	4.63686e-23
GOTERM_BP_FAT	GO:0040012~regulation of locomotion	27	19.708	5.4207e-23	ENSG00000101665, ENSG00000105329, ENSG00000113721, ENSG00000182871, ENSG00000092969, ENSG00000100985, ENSG00000137801, ENSG00000181104, ENSG00000101680, ENSG00000168615, ENSG00000151694, ENSG00000091136, ENSG00000139567, ENSG00000100852, ENSG00000128052, ENSG00000146674, ENSG00000053747, ENSG00000173334, ENSG00000122194, ENSG00000069702, ENSG00000138685, ENSG00000132855, ENSG00000135919, ENSG0000…	130	192	13528	14.6337	9.63259e-20	1.07029e-20	9.19125e-20
KEGG_PATHWAY	hsa04810:Regulation of actin cytoskeleton	27	19.708	4.90944e-15	ENSG00000103653, ENSG00000138448, ENSG00000113721, ENSG00000078061, ENSG00000105855, ENSG00000115221, ENSG00000130402, ENSG00000145431, ENSG00000115414, ENSG00000143127, ENSG00000005961, ENSG00000181104, ENSG00000082781, ENSG00000089159, ENSG00000161638, ENSG00000135424, ENSG00000005884, ENSG00000150093, ENSG00000139626, ENSG00000077943, ENSG00000144668, ENSG00000180370, ENSG00000169398, ENSG0000…	96	215	5085	6.65189	3.85914e-13	1.28675e-13	5.18474e-12
GOTERM_BP_FAT	GO:0051174~regulation of phosphorus metabolic process	27	19.708	5.44857e-13	ENSG00000105974, ENSG00000101665, ENSG00000105329, ENSG00000113721, ENSG00000106799, ENSG00000092969, ENSG00000145431, ENSG00000177606, ENSG00000137801, ENSG00000181104, ENSG00000101224, ENSG00000168615, ENSG00000151694, ENSG00000141736, ENSG00000163513, ENSG00000160691, ENSG00000106991, ENSG00000164305, ENSG00000146674, ENSG00000173334, ENSG00000019991, ENSG00000180370, ENSG00000123384, ENSG0000…	130	485	13528	5.79312	9.68283e-10	3.72417e-11	9.23916e-10
GOTERM_BP_FAT	GO:0019220~regulation of phosphate metabolic process	27	19.708	5.44857e-13	ENSG00000105974, ENSG00000101665, ENSG00000105329, ENSG00000113721, ENSG00000106799, ENSG00000092969, ENSG00000145431, ENSG00000177606, ENSG00000137801, ENSG00000181104, ENSG00000101224, ENSG00000168615, ENSG00000151694, ENSG00000141736, ENSG00000163513, ENSG00000160691, ENSG00000106991, ENSG00000164305, ENSG00000146674, ENSG00000173334, ENSG00000019991, ENSG00000180370, ENSG00000123384, ENSG0000…	130	485	13528	5.79312	9.68283e-10	3.72417e-11	9.23916e-10
GOTERM_BP_FAT	GO:0042981~regulation of apoptosis	27	19.708	3.17992e-08	ENSG00000179218, ENSG00000105329, ENSG00000182871, ENSG00000197122, ENSG00000092969, ENSG00000106799, ENSG00000142949, ENSG00000100985, ENSG00000130402, ENSG00000177606, ENSG00000026508, ENSG00000137801, ENSG00000167004, ENSG00000181104, ENSG00000167772, ENSG00000168615, ENSG00000151694, ENSG00000141736, ENSG00000164305, ENSG00000146674, ENSG00000198959, ENSG00000197632, ENSG00000122194, ENSG0000…	130	804	13528	3.4946	5.65056e-05	1.0274e-06	5.39181e-05
GOTERM_BP_FAT	GO:0030334~regulation of cell migration	26	18.9781	4.18793e-23	ENSG00000101665, ENSG00000105329, ENSG00000113721, ENSG00000182871, ENSG00000092969, ENSG00000100985, ENSG00000137801, ENSG00000181104, ENSG00000101680, ENSG00000168615, ENSG00000151694, ENSG00000091136, ENSG00000139567, ENSG00000100852, ENSG00000128052, ENSG00000146674, ENSG00000053747, ENSG00000173334, ENSG00000122194, ENSG00000069702, ENSG00000138685, ENSG00000132855, ENSG00000135919, ENSG0000…	130	169	13528	16.0095	7.44194e-20	1.06313e-20	7.10097e-20
GOTERM_BP_FAT	GO:0048514~blood vessel morphogenesis	26	18.9781	1.14129e-20	ENSG00000104368, ENSG00000105974, ENSG00000101665, ENSG00000122861, ENSG00000182871, ENSG00000106799, ENSG00000092969, ENSG00000171223, ENSG00000149177, ENSG00000102554, ENSG00000177606, ENSG00000137801, ENSG00000167772, ENSG00000118523, ENSG00000135424, ENSG00000142871, ENSG00000163513, ENSG00000139567, ENSG00000128052, ENSG00000106991, ENSG00000157227, ENSG00000198959, ENSG00000145715, ENSG0000…	130	211	13528	12.8227	2.02807e-17	1.35204e-18	1.93515e-17
GOTERM_CC_FAT	GO:0031012~extracellular matrix	26	18.9781	9.07945e-15	ENSG00000008516, ENSG00000179218, ENSG00000049323, ENSG00000105329, ENSG00000182871, ENSG00000113140, ENSG00000136999, ENSG00000092969, ENSG00000100985, ENSG00000087245, ENSG00000139329, ENSG00000137673, ENSG00000115414, ENSG00000026508, ENSG00000109072, ENSG00000137801, ENSG00000101680, ENSG00000167772, ENSG00000116962, ENSG00000118523, ENSG00000163520, ENSG00000091136, ENSG00000157227, ENSG0000…	132	345	12782	7.29758	1.94822e-12	4.87055e-13	1.15352e-11
GOTERM_BP_FAT	GO:0008284~positive regulation of cell proliferation	26	18.9781	1.13679e-13	ENSG00000163513, ENSG00000160691, ENSG00000150093, ENSG00000179218, ENSG00000100852, ENSG00000105329, ENSG00000128052, ENSG00000113721, ENSG00000182871, ENSG00000198959, ENSG00000106799, ENSG00000092969, ENSG00000102554, ENSG00000145431, ENSG00000177606, ENSG00000136205, ENSG00000181104, ENSG00000101680, ENSG00000101224, ENSG00000037280, ENSG00000138685, ENSG00000151694, ENSG00000164171, ENSG0000…	130	414	13528	6.53527	2.02022e-10	8.08087e-12	1.92768e-10
GOTERM_BP_FAT	GO:0042325~regulation of phosphorylation	26	18.9781	1.60168e-12	ENSG00000105974, ENSG00000101665, ENSG00000105329, ENSG00000113721, ENSG00000106799, ENSG00000092969, ENSG00000145431, ENSG00000177606, ENSG00000137801, ENSG00000181104, ENSG00000101224, ENSG00000168615, ENSG00000151694, ENSG00000141736, ENSG00000163513, ENSG00000160691, ENSG00000106991, ENSG00000164305, ENSG00000146674, ENSG00000173334, ENSG00000019991, ENSG00000180370, ENSG00000123384, ENSG0000…	130	466	13528	5.80601	2.84625e-09	1.05417e-10	2.71585e-09
KEGG_PATHWAY	hsa05200:Pathways in cancer	26	18.9781	6.22684e-10	ENSG00000138448, ENSG00000105329, ENSG00000113721, ENSG00000078061, ENSG00000092969, ENSG00000106799, ENSG00000100985, ENSG00000087245, ENSG00000115414, ENSG00000177606, ENSG00000005961, ENSG00000101680, ENSG00000141736, ENSG00000091136, ENSG00000163513, ENSG00000005884, ENSG00000150093, ENSG00000164305, ENSG00000053747, ENSG00000019991, ENSG00000138685, ENSG00000169398, ENSG00000091409, ENSG0000…	96	328	5085	4.19874	4.9192e-08	7.02743e-09	6.60335e-07
GOTERM_BP_FAT	GO:0006468~protein amino acid phosphorylation	26	18.9781	3.27347e-09	ENSG00000103653, ENSG00000101665, ENSG00000105329, ENSG00000113721, ENSG00000078061, ENSG00000197122, ENSG00000106799, ENSG00000092969, ENSG00000137801, ENSG00000181104, ENSG00000037280, ENSG00000168615, ENSG00000141736, ENSG00000163513, ENSG00000160691, ENSG00000139567, ENSG00000128052, ENSG00000146674, ENSG00000142627, ENSG00000173334, ENSG00000019991, ENSG00000069702, ENSG00000180370, ENSG0000…	130	667	13528	4.05637	5.81694e-06	1.32204e-07	5.55044e-06
GOTERM_CC_FAT	GO:0042995~cell projection	26	18.9781	3.34328e-08	ENSG00000105329, ENSG00000138071, ENSG00000115884, ENSG00000123159, ENSG00000136999, ENSG00000115091, ENSG00000092969, ENSG00000142949, ENSG00000130402, ENSG00000162512, ENSG00000089159, ENSG00000118785, ENSG00000161638, ENSG00000151694, ENSG00000141736, ENSG00000150093, ENSG00000077943, ENSG00000107957, ENSG00000145715, ENSG00000081479, ENSG00000123384, ENSG00000169398, ENSG00000140416, ENSG0000…	132	697	12782	3.61215	7.1546e-06	3.57731e-07	4.23685e-05
GOTERM_BP_FAT	GO:0016310~phosphorylation	26	18.9781	1.18817e-07	ENSG00000103653, ENSG00000101665, ENSG00000105329, ENSG00000113721, ENSG00000078061, ENSG00000197122, ENSG00000106799, ENSG00000092969, ENSG00000137801, ENSG00000181104, ENSG00000037280, ENSG00000168615, ENSG00000141736, ENSG00000163513, ENSG00000160691, ENSG00000139567, ENSG00000128052, ENSG00000146674, ENSG00000142627, ENSG00000173334, ENSG00000019991, ENSG00000069702, ENSG00000180370, ENSG0000…	130	800	13528	3.382	0.000211115	3.24826e-06	0.000201463
GOTERM_CC_FAT	GO:0005615~extracellular space	25	18.2482	1.02158e-07	ENSG00000104368, ENSG00000179218, ENSG00000105329, ENSG00000182871, ENSG00000092969, ENSG00000087245, ENSG00000100985, ENSG00000137673, ENSG00000145431, ENSG00000115414, ENSG00000109072, ENSG00000137801, ENSG00000167772, ENSG00000168615, ENSG00000118785, ENSG00000106991, ENSG00000146674, ENSG00000197632, ENSG00000122194, ENSG00000069702, ENSG00000108679, ENSG00000081479, ENSG00000138685, ENSG0000…	132	685	12782	3.53406	2.18615e-05	1.04103e-06	0.000129461
GOTERM_BP_FAT	GO:0010604~positive regulation of macromolecule metabolic process	24	17.5182	5.55681e-06	ENSG00000160691, ENSG00000105974, ENSG00000115641, ENSG00000101665, ENSG00000179218, ENSG00000139567, ENSG00000140682, ENSG00000105329, ENSG00000106991, ENSG00000171223, ENSG00000092969, ENSG00000106799, ENSG00000102554, ENSG00000137309, ENSG00000145431, ENSG00000177606, ENSG00000125482, ENSG00000137801, ENSG00000181104, ENSG00000138685, ENSG00000168615, ENSG00000151694, ENSG00000154229, ENSG0000…	130	857	13528	2.91421	0.00982589	0.00010971	0.00942161
GOTERM_BP_FAT	GO:0030155~regulation of cell adhesion	23	16.7883	3.25532e-21	ENSG00000135218, ENSG00000101665, ENSG00000139567, ENSG00000105329, ENSG00000106991, ENSG00000197122, ENSG00000157227, ENSG00000198959, ENSG00000053747, ENSG00000092969, ENSG00000145715, ENSG00000109072, ENSG00000137801, ENSG00000101680, ENSG00000116962, ENSG00000163520, ENSG00000142871, ENSG00000118785, ENSG00000140416, ENSG00000168615, ENSG00000091409, ENSG00000164171, ENSG00000141736	130	137	13528	17.4702	5.7847e-18	4.82058e-19	5.51966e-18
GOTERM_CC_FAT	GO:0009986~cell surface	23	16.7883	6.72913e-12	ENSG00000163513, ENSG00000135218, ENSG00000105974, ENSG00000150093, ENSG00000138448, ENSG00000008516, ENSG00000179218, ENSG00000139567, ENSG00000105329, ENSG00000106991, ENSG00000115884, ENSG00000069702, ENSG00000026508, ENSG00000011422, ENSG00000137801, ENSG00000005961, ENSG00000123384, ENSG00000161638, ENSG00000168615, ENSG00000151694, ENSG00000091409, ENSG00000164171, ENSG00000132589	132	348	12782	6.3999	1.44004e-09	1.10773e-10	8.5277e-09
GOTERM_BP_FAT	GO:0008285~negative regulation of cell proliferation	23	16.7883	3.37773e-12	ENSG00000163513, ENSG00000105974, ENSG00000103653, ENSG00000139567, ENSG00000140682, ENSG00000105329, ENSG00000164305, ENSG00000182871, ENSG00000106991, ENSG00000146674, ENSG00000173334, ENSG00000092969, ENSG00000142949, ENSG00000122194, ENSG00000069702, ENSG00000177606, ENSG00000121769, ENSG00000137801, ENSG00000181104, ENSG00000138685, ENSG00000154229, ENSG00000010278, ENSG00000141736	130	361	13528	6.62996	6.00225e-09	2.14366e-10	5.72724e-09
GOTERM_BP_FAT	GO:0044093~positive regulation of molecular function	23	16.7883	3.20397e-08	ENSG00000163513, ENSG00000160691, ENSG00000105974, ENSG00000105329, ENSG00000175591, ENSG00000198959, ENSG00000106799, ENSG00000092969, ENSG00000019991, ENSG00000130402, ENSG00000145431, ENSG00000069702, ENSG00000137801, ENSG00000181104, ENSG00000123384, ENSG00000138685, ENSG00000101224, ENSG00000140416, ENSG00000168615, ENSG00000151694, ENSG00000164171, ENSG00000136238, ENSG00000141736	130	586	13528	4.08433	5.6933e-05	1.01669e-06	5.4326e-05
GOTERM_CC_FAT	GO:0031982~vesicle	23	16.7883	1.12331e-06	ENSG00000104368, ENSG00000135218, ENSG00000153071, ENSG00000105974, ENSG00000150093, ENSG00000105329, ENSG00000113905, ENSG00000113140, ENSG00000157227, ENSG00000123159, ENSG00000092969, ENSG00000019991, ENSG00000130402, ENSG00000115414, ENSG00000081479, ENSG00000137801, ENSG00000167004, ENSG00000005961, ENSG00000123384, ENSG00000196396, ENSG00000118785, ENSG00000010278, ENSG00000136238	132	670	12782	3.32413	0.00024036	9.24567e-06	0.00142353
GOTERM_BP_FAT	GO:0042592~homeostatic process	23	16.7883	2.2405e-06	ENSG00000105974, ENSG00000100823, ENSG00000101665, ENSG00000179218, ENSG00000105329, ENSG00000128052, ENSG00000113721, ENSG00000175591, ENSG00000164305, ENSG00000163347, ENSG00000198959, ENSG00000122194, ENSG00000069702, ENSG00000177606, ENSG00000167004, ENSG00000181104, ENSG00000122729, ENSG00000132855, ENSG00000154229, ENSG00000010278, ENSG00000164171, ENSG00000141736, ENSG00000136238	130	751	13528	3.18697	0.00397346	4.85522e-05	0.00379889
GOTERM_BP_FAT	GO:0031589~cell-substrate adhesion	22	16.0584	4.57485e-23	ENSG00000005884, ENSG00000150093, ENSG00000138448, ENSG00000139626, ENSG00000077943, ENSG00000105855, ENSG00000115221, ENSG00000115414, ENSG00000026508, ENSG00000143127, ENSG00000109072, ENSG00000005961, ENSG00000118523, ENSG00000116962, ENSG00000082781, ENSG00000089159, ENSG00000132855, ENSG00000135424, ENSG00000168615, ENSG00000091409, ENSG00000164171, ENSG00000091136	130	98	13528	23.3608	8.12951e-20	1.01619e-20	7.75703e-20
GOTERM_BP_FAT	GO:0042060~wound healing	22	16.0584	8.44941e-17	ENSG00000104368, ENSG00000135218, ENSG00000163513, ENSG00000139567, ENSG00000105329, ENSG00000122861, ENSG00000106991, ENSG00000115884, ENSG00000197632, ENSG00000092969, ENSG00000122194, ENSG00000115414, ENSG00000026508, ENSG00000011422, ENSG00000181104, ENSG00000138685, ENSG00000161638, ENSG00000140416, ENSG00000151694, ENSG00000010278, ENSG00000164171, ENSG00000141736	130	191	13528	11.9861	1.97287e-13	1.04361e-14	1.88738e-13
GOTERM_CC_FAT	GO:0005578~proteinaceous extracellular matrix	22	16.0584	1.05223e-11	ENSG00000008516, ENSG00000179218, ENSG00000049323, ENSG00000105329, ENSG00000182871, ENSG00000113140, ENSG00000157227, ENSG00000053747, ENSG00000152377, ENSG00000100985, ENSG00000139329, ENSG00000087245, ENSG00000137673, ENSG00000115414, ENSG00000109072, ENSG00000108679, ENSG00000101680, ENSG00000118523, ENSG00000167772, ENSG00000116962, ENSG00000163520, ENSG00000091136	132	320	12782	6.65729	2.25179e-09	1.60842e-10	1.33347e-08
GOTERM_CC_FAT	GO:0031410~cytoplasmic vesicle	22	16.0584	2.16355e-06	ENSG00000104368, ENSG00000135218, ENSG00000153071, ENSG00000105974, ENSG00000150093, ENSG00000105329, ENSG00000113905, ENSG00000113140, ENSG00000157227, ENSG00000123159, ENSG00000092969, ENSG00000019991, ENSG00000130402, ENSG00000115414, ENSG00000081479, ENSG00000137801, ENSG00000167004, ENSG00000005961, ENSG00000123384, ENSG00000196396, ENSG00000010278, ENSG00000136238	132	642	12782	3.31828	0.000462892	1.59654e-05	0.00274177
GOTERM_BP_FAT	GO:0007160~cell-matrix adhesion	21	15.3285	1.87721e-22	ENSG00000005884, ENSG00000150093, ENSG00000138448, ENSG00000139626, ENSG00000077943, ENSG00000105855, ENSG00000115221, ENSG00000115414, ENSG00000026508, ENSG00000143127, ENSG00000109072, ENSG00000005961, ENSG00000118523, ENSG00000116962, ENSG00000082781, ENSG00000089159, ENSG00000132855, ENSG00000135424, ENSG00000168615, ENSG00000091409, ENSG00000164171	130	89	13528	24.5538	3.33581e-19	3.33581e-20	3.18297e-19
GOTERM_CC_FAT	GO:0016323~basolateral plasma membrane	21	15.3285	1.72009e-14	ENSG00000105974, ENSG00000150093, ENSG00000115641, ENSG00000140682, ENSG00000175591, ENSG00000115884, ENSG00000053747, ENSG00000115091, ENSG00000106799, ENSG00000026508, ENSG00000136205, ENSG00000005961, ENSG00000089159, ENSG00000169398, ENSG00000161638, ENSG00000168615, ENSG00000151694, ENSG00000164171, ENSG00000091409, ENSG00000141736, ENSG00000137076	132	203	12782	10.0172	3.68261e-12	7.36522e-13	2.18048e-11
GOTERM_BP_FAT	GO:0043549~regulation of kinase activity	21	15.3285	1.6272e-10	ENSG00000163513, ENSG00000160691, ENSG00000105974, ENSG00000105329, ENSG00000164305, ENSG00000173334, ENSG00000092969, ENSG00000106799, ENSG00000019991, ENSG00000145431, ENSG00000137801, ENSG00000181104, ENSG00000123384, ENSG00000180370, ENSG00000138685, ENSG00000101224, ENSG00000168615, ENSG00000151694, ENSG00000154229, ENSG00000141736, ENSG00000136238	130	357	13528	6.12127	2.89154e-07	9.32755e-09	2.75906e-07
GOTERM_BP_FAT	GO:0051338~regulation of transferase activity	21	15.3285	3.36867e-10	ENSG00000163513, ENSG00000160691, ENSG00000105974, ENSG00000105329, ENSG00000164305, ENSG00000173334, ENSG00000092969, ENSG00000106799, ENSG00000019991, ENSG00000145431, ENSG00000137801, ENSG00000181104, ENSG00000123384, ENSG00000180370, ENSG00000138685, ENSG00000101224, ENSG00000168615, ENSG00000151694, ENSG00000154229, ENSG00000141736, ENSG00000136238	130	372	13528	5.87444	5.98612e-07	1.87066e-08	5.71185e-07
GOTERM_BP_FAT	GO:0009719~response to endogenous stimulus	21	15.3285	1.4851e-09	ENSG00000163513, ENSG00000160691, ENSG00000105974, ENSG00000115641, ENSG00000105329, ENSG00000115884, ENSG00000197122, ENSG00000157227, ENSG00000171223, ENSG00000106799, ENSG00000092969, ENSG00000069702, ENSG00000121769, ENSG00000137801, ENSG00000196396, ENSG00000118785, ENSG00000168615, ENSG00000151694, ENSG00000154229, ENSG00000164171, ENSG00000141736	130	405	13528	5.39578	2.63902e-06	6.76672e-08	2.51811e-06
GOTERM_CC_FAT	GO:0030054~cell junction	21	15.3285	2.96685e-07	ENSG00000105974, ENSG00000150093, ENSG00000103653, ENSG00000115641, ENSG00000101665, ENSG00000140682, ENSG00000163347, ENSG00000115884, ENSG00000053747, ENSG00000115091, ENSG00000149177, ENSG00000026508, ENSG00000136205, ENSG00000005961, ENSG00000169398, ENSG00000089159, ENSG00000161638, ENSG00000151694, ENSG00000164171, ENSG00000091409, ENSG00000137076	132	518	12782	3.92568	6.34887e-05	2.64544e-06	0.000375981
GOTERM_BP_FAT	GO:0043085~positive regulation of catalytic activity	21	15.3285	9.88978e-08	ENSG00000163513, ENSG00000160691, ENSG00000105974, ENSG00000105329, ENSG00000175591, ENSG00000198959, ENSG00000106799, ENSG00000092969, ENSG00000019991, ENSG00000145431, ENSG00000137801, ENSG00000181104, ENSG00000123384, ENSG00000138685, ENSG00000101224, ENSG00000140416, ENSG00000168615, ENSG00000151694, ENSG00000164171, ENSG00000141736, ENSG00000136238	130	520	13528	4.20249	0.000175726	2.78954e-06	0.000167689
GOTERM_CC_FAT	GO:0031988~membrane-bounded vesicle	21	15.3285	1.26329e-06	ENSG00000104368, ENSG00000135218, ENSG00000153071, ENSG00000150093, ENSG00000105329, ENSG00000113905, ENSG00000113140, ENSG00000157227, ENSG00000123159, ENSG00000092969, ENSG00000019991, ENSG00000130402, ENSG00000115414, ENSG00000081479, ENSG00000137801, ENSG00000167004, ENSG00000005961, ENSG00000123384, ENSG00000118785, ENSG00000010278, ENSG00000136238	132	568	12782	3.58011	0.000270308	1.00127e-05	0.00160092
GOTERM_CC_FAT	GO:0000267~cell fraction	21	15.3285	0.0070105	ENSG00000135218, ENSG00000105974, ENSG00000150093, ENSG00000179218, ENSG00000078061, ENSG00000106991, ENSG00000168702, ENSG00000123159, ENSG00000135047, ENSG00000142949, ENSG00000122194, ENSG00000081479, ENSG00000162512, ENSG00000177697, ENSG00000123384, ENSG00000196396, ENSG00000161638, ENSG00000154229, ENSG00000132589, ENSG00000127947, ENSG00000136238	132	1083	12782	1.87765	0.778101	0.0302579	8.52963
GOTERM_MF_FAT	GO:0032403~protein complex binding	20	14.5985	3.47629e-14	ENSG00000115325, ENSG00000160691, ENSG00000150093, ENSG00000101665, ENSG00000179218, ENSG00000139567, ENSG00000106991, ENSG00000115221, ENSG00000106799, ENSG00000142949, ENSG00000130402, ENSG00000137801, ENSG00000118523, ENSG00000196396, ENSG00000132855, ENSG00000161638, ENSG00000168615, ENSG00000151694, ENSG00000164171, ENSG00000091409	126	196	12983	10.5143	1.08072e-11	5.40368e-12	4.6696e-11
GOTERM_BP_FAT	GO:0045859~regulation of protein kinase activity	20	14.5985	6.51325e-10	ENSG00000163513, ENSG00000160691, ENSG00000105974, ENSG00000105329, ENSG00000164305, ENSG00000173334, ENSG00000092969, ENSG00000106799, ENSG00000019991, ENSG00000145431, ENSG00000137801, ENSG00000181104, ENSG00000123384, ENSG00000180370, ENSG00000138685, ENSG00000101224, ENSG00000168615, ENSG00000151694, ENSG00000154229, ENSG00000141736	130	345	13528	6.03255	1.1574e-06	3.21501e-08	1.10437e-06
GOTERM_BP_FAT	GO:0009725~response to hormone stimulus	20	14.5985	1.82745e-09	ENSG00000163513, ENSG00000160691, ENSG00000105974, ENSG00000115641, ENSG00000105329, ENSG00000115884, ENSG00000197122, ENSG00000157227, ENSG00000171223, ENSG00000092969, ENSG00000106799, ENSG00000069702, ENSG00000121769, ENSG00000137801, ENSG00000196396, ENSG00000118785, ENSG00000168615, ENSG00000154229, ENSG00000164171, ENSG00000141736	130	367	13528	5.67093	3.24737e-06	7.73184e-08	3.09859e-06
GOTERM_CC_FAT	GO:0016023~cytoplasmic membrane-bounded vesicle	20	14.5985	3.17476e-06	ENSG00000104368, ENSG00000135218, ENSG00000153071, ENSG00000150093, ENSG00000105329, ENSG00000113905, ENSG00000113140, ENSG00000157227, ENSG00000123159, ENSG00000092969, ENSG00000019991, ENSG00000130402, ENSG00000115414, ENSG00000081479, ENSG00000137801, ENSG00000167004, ENSG00000005961, ENSG00000123384, ENSG00000010278, ENSG00000136238	132	550	12782	3.52121	0.000679169	2.1231e-05	0.00402321
GOTERM_BP_FAT	GO:0007229~integrin-mediated signaling pathway	19	13.8686	1.87054e-21	ENSG00000005884, ENSG00000150093, ENSG00000138448, ENSG00000139626, ENSG00000077943, ENSG00000105855, ENSG00000115221, ENSG00000143127, ENSG00000144668, ENSG00000005961, ENSG00000118523, ENSG00000082781, ENSG00000169398, ENSG00000132855, ENSG00000161638, ENSG00000135424, ENSG00000168615, ENSG00000091409, ENSG00000164171	130	70	13528	28.2453	3.32394e-18	3.02177e-19	3.17165e-18
GOTERM_CC_FAT	GO:0043235~receptor complex	19	13.8686	1.08597e-16	ENSG00000163513, ENSG00000005884, ENSG00000150093, ENSG00000138448, ENSG00000139626, ENSG00000077943, ENSG00000106991, ENSG00000105855, ENSG00000115221, ENSG00000106799, ENSG00000143127, ENSG00000144668, ENSG00000005961, ENSG00000082781, ENSG00000161638, ENSG00000135424, ENSG00000091409, ENSG00000164171, ENSG00000141736	132	116	12782	15.8606	2.37588e-14	7.88258e-15	1.44329e-13
KEGG_PATHWAY	hsa05410:Hypertrophic cardiomyopathy (HCM)	19	13.8686	6.42867e-15	ENSG00000167460, ENSG00000005884, ENSG00000150093, ENSG00000138448, ENSG00000105329, ENSG00000139626, ENSG00000077943, ENSG00000105855, ENSG00000115221, ENSG00000092969, ENSG00000143127, ENSG00000144668, ENSG00000005961, ENSG00000082781, ENSG00000161638, ENSG00000135424, ENSG00000140416, ENSG00000091409, ENSG00000164171	96	85	5085	11.8401	5.08704e-13	1.27232e-13	6.82787e-12
KEGG_PATHWAY	hsa05414:Dilated cardiomyopathy	19	13.8686	2.82829e-14	ENSG00000167460, ENSG00000005884, ENSG00000150093, ENSG00000138448, ENSG00000105329, ENSG00000139626, ENSG00000077943, ENSG00000105855, ENSG00000115221, ENSG00000092969, ENSG00000143127, ENSG00000144668, ENSG00000005961, ENSG00000082781, ENSG00000161638, ENSG00000135424, ENSG00000140416, ENSG00000091409, ENSG00000164171	96	92	5085	10.9392	2.23654e-12	4.47309e-13	3.00204e-11
GOTERM_BP_FAT	GO:0007169~transmembrane receptor protein tyrosine kinase signaling pathway	19	13.8686	3.83847e-12	ENSG00000104368, ENSG00000115325, ENSG00000160691, ENSG00000105329, ENSG00000128052, ENSG00000113721, ENSG00000197122, ENSG00000142627, ENSG00000019991, ENSG00000149177, ENSG00000145431, ENSG00000118523, ENSG00000138685, ENSG00000037280, ENSG00000089159, ENSG00000196396, ENSG00000169398, ENSG00000151694, ENSG00000141736	130	224	13528	8.82665	6.82099e-09	2.35207e-10	6.50847e-09
GOTERM_BP_FAT	GO:0032268~regulation of cellular protein metabolic process	19	13.8686	5.56234e-07	ENSG00000105974, ENSG00000138448, ENSG00000101665, ENSG00000179218, ENSG00000105329, ENSG00000113721, ENSG00000106991, ENSG00000146674, ENSG00000123159, ENSG00000106799, ENSG00000145431, ENSG00000177606, ENSG00000137801, ENSG00000122729, ENSG00000138685, ENSG00000168615, ENSG00000151694, ENSG00000154229, ENSG00000164171	130	474	13528	4.17124	0.00098794	1.37281e-05	0.000943137
GOTERM_MF_FAT	GO:0004672~protein kinase activity	19	13.8686	1.92899e-05	ENSG00000163513, ENSG00000103653, ENSG00000049323, ENSG00000139567, ENSG00000128052, ENSG00000113721, ENSG00000078061, ENSG00000106991, ENSG00000197122, ENSG00000142627, ENSG00000173334, ENSG00000092969, ENSG00000106799, ENSG00000069702, ENSG00000180370, ENSG00000037280, ENSG00000169398, ENSG00000154229, ENSG00000141736	126	606	12983	3.23062	0.00598125	0.00037488	0.0259155
GOTERM_BP_FAT	GO:0010557~positive regulation of macromolecule biosynthetic process	19	13.8686	4.7412e-05	ENSG00000160691, ENSG00000115641, ENSG00000179218, ENSG00000139567, ENSG00000140682, ENSG00000105329, ENSG00000106991, ENSG00000171223, ENSG00000092969, ENSG00000106799, ENSG00000102554, ENSG00000137309, ENSG00000145431, ENSG00000177606, ENSG00000125482, ENSG00000137801, ENSG00000181104, ENSG00000138685, ENSG00000164171	130	654	13528	3.02319	0.0808014	0.000696064	0.0803605
GOTERM_BP_FAT	GO:0009891~positive regulation of biosynthetic process	19	13.8686	0.000103371	ENSG00000160691, ENSG00000115641, ENSG00000179218, ENSG00000139567, ENSG00000140682, ENSG00000105329, ENSG00000106991, ENSG00000171223, ENSG00000092969, ENSG00000106799, ENSG00000102554, ENSG00000137309, ENSG00000145431, ENSG00000177606, ENSG00000125482, ENSG00000137801, ENSG00000181104, ENSG00000138685, ENSG00000164171	130	695	13528	2.84485	0.167814	0.0013207	0.175129
GOTERM_CC_FAT	GO:0005626~insoluble fraction	19	13.8686	0.00224039	ENSG00000135218, ENSG00000105974, ENSG00000150093, ENSG00000179218, ENSG00000078061, ENSG00000106991, ENSG00000168702, ENSG00000123159, ENSG00000142949, ENSG00000122194, ENSG00000081479, ENSG00000162512, ENSG00000177697, ENSG00000123384, ENSG00000196396, ENSG00000161638, ENSG00000154229, ENSG00000132589, ENSG00000136238	132	839	12782	2.19289	0.381205	0.0106096	2.80235
GOTERM_BP_FAT	GO:0031328~positive regulation of cellular biosynthetic process	18	13.1387	0.00027078	ENSG00000160691, ENSG00000115641, ENSG00000179218, ENSG00000139567, ENSG00000140682, ENSG00000105329, ENSG00000106991, ENSG00000106799, ENSG00000171223, ENSG00000102554, ENSG00000137309, ENSG00000145431, ENSG00000177606, ENSG00000125482, ENSG00000137801, ENSG00000181104, ENSG00000138685, ENSG00000164171	130	685	13528	2.73446	0.381984	0.00296622	0.458139
GOTERM_BP_FAT	GO:0051272~positive regulation of cell motion	17	12.4088	8.49323e-16	ENSG00000105329, ENSG00000100852, ENSG00000128052, ENSG00000113721, ENSG00000182871, ENSG00000092969, ENSG00000106799, ENSG00000100985, ENSG00000130402, ENSG00000137801, ENSG00000181104, ENSG00000138685, ENSG00000132855, ENSG00000168615, ENSG00000151694, ENSG00000164171, ENSG00000091136	130	98	13528	18.0515	1.57829e-12	7.89369e-14	1.5099e-12
GOTERM_MF_FAT	GO:0019838~growth factor binding	17	12.4088	3.08638e-15	ENSG00000135218, ENSG00000163513, ENSG00000168056, ENSG00000049323, ENSG00000139567, ENSG00000128052, ENSG00000113721, ENSG00000106991, ENSG00000146674, ENSG00000136999, ENSG00000106799, ENSG00000069702, ENSG00000137801, ENSG00000118523, ENSG00000037280, ENSG00000142871, ENSG00000141736	126	105	12983	16.6826	9.66782e-13	9.66782e-13	4.17444e-12
GOTERM_CC_FAT	GO:0005912~adherens junction	17	12.4088	4.18264e-12	ENSG00000105974, ENSG00000150093, ENSG00000115641, ENSG00000101665, ENSG00000140682, ENSG00000115884, ENSG00000053747, ENSG00000026508, ENSG00000136205, ENSG00000005961, ENSG00000169398, ENSG00000089159, ENSG00000161638, ENSG00000151694, ENSG00000164171, ENSG00000091409, ENSG00000137076	132	155	12782	10.6204	8.95088e-10	7.45907e-11	5.30057e-09
GOTERM_CC_FAT	GO:0070161~anchoring junction	17	12.4088	2.07418e-11	ENSG00000105974, ENSG00000150093, ENSG00000115641, ENSG00000101665, ENSG00000140682, ENSG00000115884, ENSG00000053747, ENSG00000026508, ENSG00000136205, ENSG00000005961, ENSG00000169398, ENSG00000089159, ENSG00000161638, ENSG00000151694, ENSG00000164171, ENSG00000091409, ENSG00000137076	132	172	12782	9.57074	4.43873e-09	2.95916e-10	2.62855e-08
GOTERM_BP_FAT	GO:0010647~positive regulation of cell communication	17	12.4088	9.22695e-08	ENSG00000105974, ENSG00000139567, ENSG00000140682, ENSG00000105329, ENSG00000077943, ENSG00000106991, ENSG00000197122, ENSG00000198959, ENSG00000123159, ENSG00000092969, ENSG00000106799, ENSG00000137801, ENSG00000181104, ENSG00000151694, ENSG00000164171, ENSG00000141736, ENSG00000136238	130	329	13528	5.37704	0.000163949	2.64456e-06	0.00015645
GOTERM_BP_FAT	GO:0040008~regulation of growth	17	12.4088	1.50683e-07	ENSG00000163513, ENSG00000153071, ENSG00000160691, ENSG00000139567, ENSG00000105329, ENSG00000146674, ENSG00000136999, ENSG00000092969, ENSG00000106799, ENSG00000026508, ENSG00000180370, ENSG00000118523, ENSG00000138685, ENSG00000169398, ENSG00000142871, ENSG00000118785, ENSG00000151694	130	341	13528	5.18782	0.000267728	3.99647e-06	0.000255495
GOTERM_CC_FAT	GO:0005624~membrane fraction	17	12.4088	0.00851852	ENSG00000135218, ENSG00000105974, ENSG00000150093, ENSG00000179218, ENSG00000106991, ENSG00000168702, ENSG00000123159, ENSG00000142949, ENSG00000122194, ENSG00000081479, ENSG00000162512, ENSG00000177697, ENSG00000123384, ENSG00000161638, ENSG00000154229, ENSG00000132589, ENSG00000136238	132	809	12782	2.03482	0.83971	0.0359532	10.2745
GOTERM_BP_FAT	GO:0045785~positive regulation of cell adhesion	16	11.6788	7.69477e-18	ENSG00000135218, ENSG00000101665, ENSG00000197122, ENSG00000198959, ENSG00000092969, ENSG00000109072, ENSG00000137801, ENSG00000116962, ENSG00000163520, ENSG00000142871, ENSG00000118785, ENSG00000140416, ENSG00000168615, ENSG00000091409, ENSG00000164171, ENSG00000141736	130	60	13528	27.7497	1.36736e-14	7.59645e-16	1.30471e-14
GOTERM_BP_FAT	GO:0040017~positive regulation of locomotion	16	11.6788	2.00138e-14	ENSG00000105329, ENSG00000100852, ENSG00000128052, ENSG00000113721, ENSG00000182871, ENSG00000092969, ENSG00000100985, ENSG00000137801, ENSG00000181104, ENSG00000138685, ENSG00000132855, ENSG00000168615, ENSG00000151694, ENSG00000154229, ENSG00000164171, ENSG00000091136	130	98	13528	16.9896	3.55116e-11	1.61415e-12	3.3884e-11
GOTERM_CC_FAT	GO:0030055~cell-substrate junction	16	11.6788	4.33277e-13	ENSG00000105974, ENSG00000150093, ENSG00000115641, ENSG00000140682, ENSG00000115884, ENSG00000053747, ENSG00000115091, ENSG00000026508, ENSG00000136205, ENSG00000005961, ENSG00000169398, ENSG00000089159, ENSG00000161638, ENSG00000151694, ENSG00000164171, ENSG00000137076	132	112	12782	13.8333	9.27305e-11	1.32472e-11	5.49139e-10
KEGG_PATHWAY	hsa05412:Arrhythmogenic right ventricular cardiomyopathy (ARVC)	16	11.6788	4.27658e-12	ENSG00000005884, ENSG00000150093, ENSG00000138448, ENSG00000139626, ENSG00000077943, ENSG00000105855, ENSG00000115221, ENSG00000130402, ENSG00000143127, ENSG00000144668, ENSG00000005961, ENSG00000082781, ENSG00000161638, ENSG00000135424, ENSG00000164171, ENSG00000091409	96	76	5085	11.1513	3.3785e-10	5.63083e-11	4.53516e-09
GOTERM_BP_FAT	GO:0001525~angiogenesis	16	11.6788	9.66326e-12	ENSG00000163513, ENSG00000139567, ENSG00000122861, ENSG00000128052, ENSG00000182871, ENSG00000106991, ENSG00000157227, ENSG00000092969, ENSG00000102554, ENSG00000177606, ENSG00000137801, ENSG00000167772, ENSG00000118523, ENSG00000138685, ENSG00000169398, ENSG00000142871	130	148	13528	11.2499	1.71716e-08	5.72388e-10	1.63849e-08
GOTERM_BP_FAT	GO:0033674~positive regulation of kinase activity	16	11.6788	5.18086e-09	ENSG00000163513, ENSG00000160691, ENSG00000105329, ENSG00000092969, ENSG00000106799, ENSG00000019991, ENSG00000145431, ENSG00000137801, ENSG00000181104, ENSG00000123384, ENSG00000138685, ENSG00000101224, ENSG00000168615, ENSG00000151694, ENSG00000141736, ENSG00000136238	130	231	13528	7.20773	9.20635e-06	1.87886e-07	8.78458e-06
GOTERM_BP_FAT	GO:0051347~positive regulation of transferase activity	16	11.6788	8.70638e-09	ENSG00000163513, ENSG00000160691, ENSG00000105329, ENSG00000092969, ENSG00000106799, ENSG00000019991, ENSG00000145431, ENSG00000137801, ENSG00000181104, ENSG00000123384, ENSG00000138685, ENSG00000101224, ENSG00000168615, ENSG00000151694, ENSG00000141736, ENSG00000136238	130	240	13528	6.93744	1.54711e-05	3.03357e-07	1.47624e-05
GOTERM_BP_FAT	GO:0051094~positive regulation of developmental process	16	11.6788	6.19707e-08	ENSG00000135218, ENSG00000163513, ENSG00000140682, ENSG00000105329, ENSG00000146674, ENSG00000092969, ENSG00000115091, ENSG00000171223, ENSG00000142949, ENSG00000177606, ENSG00000137801, ENSG00000167772, ENSG00000138685, ENSG00000132855, ENSG00000168615, ENSG00000154229	130	278	13528	5.98915	0.000110116	1.80528e-06	0.000105076
GOTERM_BP_FAT	GO:0009967~positive regulation of signal transduction	16	11.6788	1.3473e-07	ENSG00000105974, ENSG00000139567, ENSG00000140682, ENSG00000105329, ENSG00000077943, ENSG00000106991, ENSG00000197122, ENSG00000198959, ENSG00000123159, ENSG00000092969, ENSG00000106799, ENSG00000137801, ENSG00000181104, ENSG00000151694, ENSG00000141736, ENSG00000136238	130	295	13528	5.64402	0.000239387	3.6275e-06	0.000228446
GOTERM_BP_FAT	GO:0032989~cellular component morphogenesis	16	11.6788	5.61477e-06	ENSG00000153071, ENSG00000150093, ENSG00000105329, ENSG00000182871, ENSG00000092969, ENSG00000019991, ENSG00000115414, ENSG00000069702, ENSG00000101680, ENSG00000169398, ENSG00000140416, ENSG00000154229, ENSG00000010278, ENSG00000141736, ENSG00000136238, ENSG00000091136	130	397	13528	4.19392	0.00992786	0.000109637	0.00951988
GOTERM_BP_FAT	GO:0043065~positive regulation of apoptosis	16	11.6788	1.4565e-05	ENSG00000105329, ENSG00000182871, ENSG00000164305, ENSG00000146674, ENSG00000197122, ENSG00000198959, ENSG00000092969, ENSG00000106799, ENSG00000142949, ENSG00000122194, ENSG00000100985, ENSG00000026508, ENSG00000177606, ENSG00000167004, ENSG00000154229, ENSG00000136238	130	430	13528	3.87206	0.0255502	0.000253715	0.0246933
GOTERM_BP_FAT	GO:0043068~positive regulation of programmed cell death	16	11.6788	1.5808e-05	ENSG00000105329, ENSG00000182871, ENSG00000164305, ENSG00000146674, ENSG00000197122, ENSG00000198959, ENSG00000092969, ENSG00000106799, ENSG00000142949, ENSG00000122194, ENSG00000100985, ENSG00000026508, ENSG00000177606, ENSG00000167004, ENSG00000154229, ENSG00000136238	130	433	13528	3.84523	0.0277001	0.000270069	0.0268003
GOTERM_BP_FAT	GO:0010942~positive regulation of cell death	16	11.6788	1.66881e-05	ENSG00000105329, ENSG00000182871, ENSG00000164305, ENSG00000146674, ENSG00000197122, ENSG00000198959, ENSG00000092969, ENSG00000106799, ENSG00000142949, ENSG00000122194, ENSG00000100985, ENSG00000026508, ENSG00000177606, ENSG00000167004, ENSG00000154229, ENSG00000136238	130	435	13528	3.82755	0.0292195	0.000274545	0.0282922
GOTERM_BP_FAT	GO:0019725~cellular homeostasis	16	11.6788	3.71249e-05	ENSG00000100823, ENSG00000105974, ENSG00000179218, ENSG00000101665, ENSG00000105329, ENSG00000175591, ENSG00000163347, ENSG00000198959, ENSG00000122194, ENSG00000177606, ENSG00000167004, ENSG00000181104, ENSG00000122729, ENSG00000154229, ENSG00000010278, ENSG00000141736	130	466	13528	3.57293	0.0638431	0.000573506	0.0629297
GOTERM_BP_FAT	GO:0045935~positive regulation of nucleobase, nucleoside, nucleotide and nucleic acid metabolic process	16	11.6788	0.000878964	ENSG00000160691, ENSG00000115641, ENSG00000179218, ENSG00000140682, ENSG00000105329, ENSG00000139567, ENSG00000106991, ENSG00000106799, ENSG00000171223, ENSG00000102554, ENSG00000137309, ENSG00000145431, ENSG00000177606, ENSG00000125482, ENSG00000181104, ENSG00000138685	130	624	13528	2.66824	0.790411	0.00832136	1.47995
GOTERM_BP_FAT	GO:0051173~positive regulation of nitrogen compound metabolic process	16	11.6788	0.00120708	ENSG00000160691, ENSG00000115641, ENSG00000179218, ENSG00000140682, ENSG00000105329, ENSG00000139567, ENSG00000106991, ENSG00000106799, ENSG00000171223, ENSG00000102554, ENSG00000137309, ENSG00000145431, ENSG00000177606, ENSG00000125482, ENSG00000181104, ENSG00000138685	130	644	13528	2.58538	0.883081	0.0109462	2.02711
GOTERM_MF_FAT	GO:0042802~identical protein binding	16	11.6788	0.00123461	ENSG00000105974, ENSG00000150093, ENSG00000115641, ENSG00000105329, ENSG00000139626, ENSG00000163347, ENSG00000106991, ENSG00000123159, ENSG00000092969, ENSG00000130402, ENSG00000145431, ENSG00000137801, ENSG00000005961, ENSG00000180370, ENSG00000164171, ENSG00000141736	126	640	12983	2.57599	0.319006	0.0152506	1.6462
GOTERM_CC_FAT	GO:0008305~integrin complex	15	10.9489	4.67216e-21	ENSG00000005884, ENSG00000150093, ENSG00000138448, ENSG00000139626, ENSG00000077943, ENSG00000105855, ENSG00000115221, ENSG00000143127, ENSG00000144668, ENSG00000005961, ENSG00000082781, ENSG00000161638, ENSG00000135424, ENSG00000164171, ENSG00000091409	132	29	12782	50.0862	9.99843e-19	9.99843e-19	5.92091e-18
GOTERM_BP_FAT	GO:0030335~positive regulation of cell migration	15	10.9489	1.04395e-13	ENSG00000105329, ENSG00000100852, ENSG00000128052, ENSG00000113721, ENSG00000182871, ENSG00000092969, ENSG00000100985, ENSG00000137801, ENSG00000181104, ENSG00000138685, ENSG00000132855, ENSG00000168615, ENSG00000151694, ENSG00000164171, ENSG00000091136	130	89	13528	17.5385	1.85449e-10	7.72704e-12	1.76947e-10
GOTERM_CC_FAT	GO:0005925~focal adhesion	15	10.9489	1.9291e-12	ENSG00000105974, ENSG00000150093, ENSG00000115641, ENSG00000140682, ENSG00000115884, ENSG00000053747, ENSG00000026508, ENSG00000136205, ENSG00000005961, ENSG00000169398, ENSG00000089159, ENSG00000161638, ENSG00000151694, ENSG00000164171, ENSG00000137076	132	102	12782	14.2402	4.12832e-10	4.12832e-11	2.44472e-09
GOTERM_CC_FAT	GO:0005924~cell-substrate adherens junction	15	10.9489	3.31353e-12	ENSG00000105974, ENSG00000150093, ENSG00000115641, ENSG00000140682, ENSG00000115884, ENSG00000053747, ENSG00000026508, ENSG00000136205, ENSG00000005961, ENSG00000169398, ENSG00000089159, ENSG00000161638, ENSG00000151694, ENSG00000164171, ENSG00000137076	132	106	12782	13.7028	7.09104e-10	6.4464e-11	4.1992e-09
GOTERM_BP_FAT	GO:0051130~positive regulation of cellular component organization	15	10.9489	1.81765e-09	ENSG00000105974, ENSG00000179218, ENSG00000140682, ENSG00000105329, ENSG00000092969, ENSG00000115091, ENSG00000106799, ENSG00000142949, ENSG00000130402, ENSG00000135404, ENSG00000140416, ENSG00000168615, ENSG00000154229, ENSG00000164171, ENSG00000136238	130	181	13528	8.62388	3.22996e-06	7.87797e-08	3.08198e-06
GOTERM_BP_FAT	GO:0045860~positive regulation of protein kinase activity	15	10.9489	2.66125e-08	ENSG00000163513, ENSG00000160691, ENSG00000105329, ENSG00000092969, ENSG00000106799, ENSG00000019991, ENSG00000145431, ENSG00000137801, ENSG00000181104, ENSG00000123384, ENSG00000138685, ENSG00000101224, ENSG00000168615, ENSG00000151694, ENSG00000141736	130	223	13528	6.99966	4.72893e-05	8.75749e-07	4.51237e-05
GOTERM_MF_FAT	GO:0004175~endopeptidase activity	15	10.9489	1.47622e-05	ENSG00000104368, ENSG00000008516, ENSG00000122861, ENSG00000164305, ENSG00000157227, ENSG00000197632, ENSG00000135047, ENSG00000122194, ENSG00000019991, ENSG00000087245, ENSG00000100985, ENSG00000137673, ENSG00000167004, ENSG00000168615, ENSG00000151694	126	375	12983	4.12159	0.00458054	0.000306024	0.0198332
GOTERM_BP_FAT	GO:0008283~cell proliferation	15	10.9489	7.03281e-05	ENSG00000153071, ENSG00000105329, ENSG00000078081, ENSG00000197122, ENSG00000157227, ENSG00000092969, ENSG00000019991, ENSG00000152377, ENSG00000069702, ENSG00000081479, ENSG00000123384, ENSG00000142871, ENSG00000164171, ENSG00000141736, ENSG00000136238	130	436	13528	3.5801	0.117483	0.000953571	0.11918
GOTERM_BP_FAT	GO:0048878~chemical homeostasis	15	10.9489	0.000373127	ENSG00000105974, ENSG00000179218, ENSG00000101665, ENSG00000105329, ENSG00000128052, ENSG00000175591, ENSG00000163347, ENSG00000198959, ENSG00000177606, ENSG00000181104, ENSG00000122729, ENSG00000132855, ENSG00000154229, ENSG00000010278, ENSG00000141736	130	512	13528	3.04868	0.484785	0.00387068	0.630788
GOTERM_MF_FAT	GO:0070011~peptidase activity, acting on L-amino acid peptides	15	10.9489	0.000808719	ENSG00000104368, ENSG00000008516, ENSG00000122861, ENSG00000164305, ENSG00000157227, ENSG00000197632, ENSG00000135047, ENSG00000122194, ENSG00000019991, ENSG00000087245, ENSG00000100985, ENSG00000137673, ENSG00000167004, ENSG00000168615, ENSG00000151694	126	549	12983	2.81529	0.222455	0.0108801	1.08118
GOTERM_MF_FAT	GO:0008233~peptidase activity	15	10.9489	0.00124046	ENSG00000104368, ENSG00000008516, ENSG00000122861, ENSG00000164305, ENSG00000157227, ENSG00000197632, ENSG00000135047, ENSG00000122194, ENSG00000019991, ENSG00000087245, ENSG00000100985, ENSG00000137673, ENSG00000167004, ENSG00000168615, ENSG00000151694	126	574	12983	2.69267	0.320245	0.0147373	1.65393
GOTERM_BP_FAT	GO:0001666~response to hypoxia	14	10.219	4.35011e-10	ENSG00000104368, ENSG00000105974, ENSG00000105329, ENSG00000122861, ENSG00000106991, ENSG00000157227, ENSG00000092969, ENSG00000106799, ENSG00000087245, ENSG00000130402, ENSG00000137801, ENSG00000167772, ENSG00000151694, ENSG00000164171	130	134	13528	10.8721	7.73015e-07	2.20861e-08	7.37597e-07
GOTERM_BP_FAT	GO:0070482~response to oxygen levels	14	10.219	8.22152e-10	ENSG00000104368, ENSG00000105974, ENSG00000105329, ENSG00000122861, ENSG00000106991, ENSG00000157227, ENSG00000092969, ENSG00000106799, ENSG00000087245, ENSG00000130402, ENSG00000137801, ENSG00000167772, ENSG00000151694, ENSG00000164171	130	141	13528	10.3324	1.46096e-06	3.84464e-08	1.39403e-06
GOTERM_BP_FAT	GO:0032101~regulation of response to external stimulus	14	10.219	3.62509e-09	ENSG00000163513, ENSG00000105974, ENSG00000105329, ENSG00000122861, ENSG00000128052, ENSG00000113905, ENSG00000198959, ENSG00000122194, ENSG00000137801, ENSG00000181104, ENSG00000118785, ENSG00000151694, ENSG00000154229, ENSG00000164171	130	159	13528	9.16265	6.44177e-06	1.43151e-07	6.14664e-06
GOTERM_CC_FAT	GO:0009897~external side of plasma membrane	14	10.219	1.91682e-08	ENSG00000163513, ENSG00000138448, ENSG00000008516, ENSG00000179218, ENSG00000106991, ENSG00000069702, ENSG00000026508, ENSG00000137801, ENSG00000005961, ENSG00000123384, ENSG00000161638, ENSG00000168615, ENSG00000091409, ENSG00000164171	132	170	12782	7.97451	4.10198e-06	2.15894e-07	2.42913e-05
GOTERM_BP_FAT	GO:0048545~response to steroid hormone stimulus	14	10.219	3.52711e-08	ENSG00000163513, ENSG00000105974, ENSG00000105329, ENSG00000115884, ENSG00000197122, ENSG00000157227, ENSG00000092969, ENSG00000106799, ENSG00000171223, ENSG00000137801, ENSG00000118785, ENSG00000168615, ENSG00000154229, ENSG00000141736	130	192	13528	7.58782	6.26748e-05	1.09959e-06	5.9805e-05
GOTERM_BP_FAT	GO:0001501~skeletal system development	14	10.219	1.10388e-05	ENSG00000163513, ENSG00000168056, ENSG00000115641, ENSG00000105329, ENSG00000113721, ENSG00000146674, ENSG00000113140, ENSG00000157227, ENSG00000106799, ENSG00000087245, ENSG00000100985, ENSG00000118523, ENSG00000118785, ENSG00000154229	130	319	13528	4.56696	0.0194248	0.000196141	0.0187155
GOTERM_BP_FAT	GO:0009628~response to abiotic stimulus	14	10.219	4.92958e-05	ENSG00000163513, ENSG00000105974, ENSG00000105329, ENSG00000182871, ENSG00000164305, ENSG00000157227, ENSG00000106799, ENSG00000171223, ENSG00000177606, ENSG00000081479, ENSG00000137801, ENSG00000154229, ENSG00000164171, ENSG00000136238	130	368	13528	3.95886	0.0838734	0.000711948	0.0835522
GOTERM_BP_FAT	GO:0007243~protein kinase cascade	14	10.219	5.21104e-05	ENSG00000160691, ENSG00000115325, ENSG00000105974, ENSG00000197122, ENSG00000106799, ENSG00000173334, ENSG00000019991, ENSG00000069702, ENSG00000137801, ENSG00000181104, ENSG00000138685, ENSG00000168615, ENSG00000154229, ENSG00000141736	130	370	13528	3.93746	0.0884443	0.000746516	0.0883207
GOTERM_BP_FAT	GO:0050801~ion homeostasis	14	10.219	0.000142958	ENSG00000105974, ENSG00000179218, ENSG00000101665, ENSG00000105329, ENSG00000128052, ENSG00000175591, ENSG00000163347, ENSG00000198959, ENSG00000177606, ENSG00000181104, ENSG00000122729, ENSG00000154229, ENSG00000010278, ENSG00000141736	130	409	13528	3.56201	0.224351	0.00172677	0.242121
KEGG_PATHWAY	hsa04010:MAPK signaling pathway	14	10.219	0.0012471	ENSG00000163513, ENSG00000105329, ENSG00000113721, ENSG00000164305, ENSG00000138032, ENSG00000092969, ENSG00000106799, ENSG00000145715, ENSG00000177606, ENSG00000180370, ENSG00000101224, ENSG00000138685, ENSG00000154229, ENSG00000136238	96	267	5085	2.77739	0.0938789	0.00614245	1.31461
GOTERM_BP_FAT	GO:0006461~protein complex assembly	14	10.219	0.00106125	ENSG00000105974, ENSG00000179218, ENSG00000105329, ENSG00000197122, ENSG00000198959, ENSG00000137309, ENSG00000145431, ENSG00000125482, ENSG00000167772, ENSG00000180370, ENSG00000169398, ENSG00000089159, ENSG00000214063, ENSG00000136238	130	505	13528	2.88487	0.84845	0.00972874	1.78428
GOTERM_BP_FAT	GO:0070271~protein complex biogenesis	14	10.219	0.00106125	ENSG00000105974, ENSG00000179218, ENSG00000105329, ENSG00000197122, ENSG00000198959, ENSG00000137309, ENSG00000145431, ENSG00000125482, ENSG00000167772, ENSG00000180370, ENSG00000169398, ENSG00000089159, ENSG00000214063, ENSG00000136238	130	505	13528	2.88487	0.84845	0.00972874	1.78428
GOTERM_MF_FAT	GO:0046983~protein dimerization activity	14	10.219	0.00215378	ENSG00000163513, ENSG00000150093, ENSG00000105329, ENSG00000106991, ENSG00000123159, ENSG00000106799, ENSG00000092969, ENSG00000171223, ENSG00000019991, ENSG00000130402, ENSG00000145431, ENSG00000177606, ENSG00000164171, ENSG00000141736	126	542	12983	2.66154	0.488572	0.0221036	2.85546
GOTERM_BP_FAT	GO:0022604~regulation of cell morphogenesis	13	9.48905	4.0891e-09	ENSG00000145715, ENSG00000069702, ENSG00000115414, ENSG00000101665, ENSG00000105329, ENSG00000140682, ENSG00000128052, ENSG00000169398, ENSG00000118785, ENSG00000135424, ENSG00000115091, ENSG00000092969, ENSG00000142949	130	131	13528	10.3267	7.2663e-06	1.54603e-07	6.9334e-06
GOTERM_BP_FAT	GO:0043062~extracellular structure organization	13	9.48905	4.83332e-08	ENSG00000100985, ENSG00000139329, ENSG00000109072, ENSG00000077943, ENSG00000181104, ENSG00000116962, ENSG00000106991, ENSG00000182871, ENSG00000169398, ENSG00000142871, ENSG00000106799, ENSG00000092969, ENSG00000141736	130	163	13528	8.29939	8.58845e-05	1.48083e-06	8.19529e-05
GOTERM_BP_FAT	GO:0001558~regulation of cell growth	13	9.48905	3.25614e-07	ENSG00000153071, ENSG00000105329, ENSG00000139567, ENSG00000146674, ENSG00000136999, ENSG00000092969, ENSG00000106799, ENSG00000026508, ENSG00000118523, ENSG00000138685, ENSG00000118785, ENSG00000142871, ENSG00000151694	130	194	13528	6.9732	0.000578449	8.26592e-06	0.000552104
GOTERM_BP_FAT	GO:0032535~regulation of cellular component size	13	9.48905	1.06927e-05	ENSG00000145715, ENSG00000153071, ENSG00000069702, ENSG00000139567, ENSG00000100852, ENSG00000105329, ENSG00000138685, ENSG00000118785, ENSG00000151694, ENSG00000115091, ENSG00000092969, ENSG00000106799, ENSG00000136238	130	271	13528	4.99188	0.0188216	0.000191911	0.0181288
GOTERM_MF_FAT	GO:0019904~protein domain specific binding	13	9.48905	8.24943e-05	ENSG00000069702, ENSG00000100852, ENSG00000081479, ENSG00000163347, ENSG00000169398, ENSG00000168615, ENSG00000135596, ENSG00000151694, ENSG00000197122, ENSG00000198959, ENSG00000123159, ENSG00000127947, ENSG00000137076	126	331	12983	4.04688	0.0253304	0.00150808	0.110786
GOTERM_BP_FAT	GO:0000902~cell morphogenesis	13	9.48905	0.000151237	ENSG00000153071, ENSG00000105329, ENSG00000182871, ENSG00000092969, ENSG00000019991, ENSG00000115414, ENSG00000069702, ENSG00000101680, ENSG00000169398, ENSG00000154229, ENSG00000141736, ENSG00000136238, ENSG00000091136	130	356	13528	3.8	0.23568	0.00179019	0.256126
GOTERM_MF_FAT	GO:0030246~carbohydrate binding	13	9.48905	0.000155352	ENSG00000163513, ENSG00000179218, ENSG00000106991, ENSG00000113905, ENSG00000115414, ENSG00000069702, ENSG00000026508, ENSG00000109072, ENSG00000137801, ENSG00000118523, ENSG00000138685, ENSG00000135919, ENSG00000142871	126	354	12983	3.78394	0.0471694	0.00253983	0.208535
GOTERM_BP_FAT	GO:0006873~cellular ion homeostasis	13	9.48905	0.000238656	ENSG00000105974, ENSG00000179218, ENSG00000101665, ENSG00000105329, ENSG00000163347, ENSG00000175591, ENSG00000198959, ENSG00000177606, ENSG00000181104, ENSG00000122729, ENSG00000154229, ENSG00000010278, ENSG00000141736	130	374	13528	3.61711	0.345669	0.00264738	0.403891
GOTERM_BP_FAT	GO:0055082~cellular chemical homeostasis	13	9.48905	0.000276048	ENSG00000105974, ENSG00000179218, ENSG00000101665, ENSG00000105329, ENSG00000163347, ENSG00000175591, ENSG00000198959, ENSG00000177606, ENSG00000181104, ENSG00000122729, ENSG00000154229, ENSG00000010278, ENSG00000141736	130	380	13528	3.56	0.387744	0.00300532	0.467033
GOTERM_MF_FAT	GO:0019899~enzyme binding	13	9.48905	0.00454478	ENSG00000145715, ENSG00000137309, ENSG00000163513, ENSG00000105974, ENSG00000101665, ENSG00000011422, ENSG00000123384, ENSG00000168615, ENSG00000173334, ENSG00000106799, ENSG00000141736, ENSG00000136238, ENSG00000091136	126	523	12983	2.56122	0.757474	0.0396674	5.93692
GOTERM_BP_FAT	GO:0045941~positive regulation of transcription	13	9.48905	0.00761899	ENSG00000102554, ENSG00000137309, ENSG00000177606, ENSG00000115641, ENSG00000139567, ENSG00000105329, ENSG00000140682, ENSG00000125482, ENSG00000181104, ENSG00000106991, ENSG00000138685, ENSG00000171223, ENSG00000106799	130	564	13528	2.39858	0.999999	0.049628	12.1624
GOTERM_MF_FAT	GO:0005178~integrin binding	12	8.75912	7.98628e-12	ENSG00000130402, ENSG00000150093, ENSG00000179218, ENSG00000137801, ENSG00000118523, ENSG00000168615, ENSG00000132855, ENSG00000161638, ENSG00000151694, ENSG00000115221, ENSG00000091409, ENSG00000164171	126	59	12983	20.9572	2.48373e-09	6.20933e-10	1.07307e-08
GOTERM_BP_FAT	GO:0007178~transmembrane receptor protein serine/threonine kinase signaling pathway	12	8.75912	3.65564e-09	ENSG00000163513, ENSG00000069702, ENSG00000168056, ENSG00000177606, ENSG00000101665, ENSG00000140682, ENSG00000139567, ENSG00000105329, ENSG00000106991, ENSG00000168615, ENSG00000092969, ENSG00000106799	130	103	13528	12.1237	6.49606e-06	1.41219e-07	6.19845e-06
GOTERM_MF_FAT	GO:0005539~glycosaminoglycan binding	12	8.75912	1.00412e-07	ENSG00000163513, ENSG00000069702, ENSG00000115414, ENSG00000026508, ENSG00000109072, ENSG00000137801, ENSG00000106991, ENSG00000118523, ENSG00000138685, ENSG00000113905, ENSG00000135919, ENSG00000142871	126	140	12983	8.83197	3.12275e-05	3.46977e-06	0.000134917
GOTERM_MF_FAT	GO:0030247~polysaccharide binding	12	8.75912	2.65557e-07	ENSG00000163513, ENSG00000069702, ENSG00000115414, ENSG00000026508, ENSG00000109072, ENSG00000137801, ENSG00000106991, ENSG00000118523, ENSG00000138685, ENSG00000113905, ENSG00000135919, ENSG00000142871	126	154	12983	8.02907	8.25847e-05	7.50798e-06	0.000356812
GOTERM_MF_FAT	GO:0001871~pattern binding	12	8.75912	2.65557e-07	ENSG00000163513, ENSG00000069702, ENSG00000115414, ENSG00000026508, ENSG00000109072, ENSG00000137801, ENSG00000106991, ENSG00000118523, ENSG00000138685, ENSG00000113905, ENSG00000135919, ENSG00000142871	126	154	12983	8.02907	8.25847e-05	7.50798e-06	0.000356812
GOTERM_CC_FAT	GO:0045177~apical part of cell	12	8.75912	2.21027e-06	ENSG00000104368, ENSG00000105974, ENSG00000115414, ENSG00000026508, ENSG00000081479, ENSG00000077943, ENSG00000175591, ENSG00000169398, ENSG00000118785, ENSG00000151694, ENSG00000106799, ENSG00000141736	132	179	12782	6.49162	0.000472887	1.57665e-05	0.00280098
GOTERM_CC_FAT	GO:0030141~secretory granule	12	8.75912	2.33385e-06	ENSG00000104368, ENSG00000135218, ENSG00000130402, ENSG00000115414, ENSG00000105329, ENSG00000137801, ENSG00000005961, ENSG00000113905, ENSG00000113140, ENSG00000010278, ENSG00000092969, ENSG00000019991	132	180	12782	6.45556	0.000499319	1.6111e-05	0.00295758
GOTERM_BP_FAT	GO:0001932~regulation of protein amino acid phosphorylation	12	8.75912	7.85337e-07	ENSG00000145431, ENSG00000105974, ENSG00000177606, ENSG00000101665, ENSG00000105329, ENSG00000113721, ENSG00000106991, ENSG00000146674, ENSG00000138685, ENSG00000151694, ENSG00000154229, ENSG00000106799	130	173	13528	7.21814	0.00139457	1.88585e-05	0.0013316
GOTERM_CC_FAT	GO:0044433~cytoplasmic vesicle part	12	8.75912	3.38207e-06	ENSG00000135218, ENSG00000130402, ENSG00000153071, ENSG00000115414, ENSG00000105329, ENSG00000137801, ENSG00000005961, ENSG00000113905, ENSG00000113140, ENSG00000010278, ENSG00000092969, ENSG00000019991	132	187	12782	6.2139	0.000723503	2.1932e-05	0.00428593
GOTERM_BP_FAT	GO:0060284~regulation of cell development	12	8.75912	4.13503e-06	ENSG00000069702, ENSG00000101665, ENSG00000179218, ENSG00000140682, ENSG00000105329, ENSG00000146674, ENSG00000138685, ENSG00000169398, ENSG00000118785, ENSG00000115091, ENSG00000092969, ENSG00000142949	130	205	13528	6.09141	0.00732104	8.54378e-05	0.00701106
GOTERM_BP_FAT	GO:0009968~negative regulation of signal transduction	12	8.75912	8.47918e-06	ENSG00000105974, ENSG00000101665, ENSG00000179218, ENSG00000140682, ENSG00000137801, ENSG00000106991, ENSG00000123384, ENSG00000146674, ENSG00000196396, ENSG00000154229, ENSG00000173334, ENSG00000142949	130	221	13528	5.6504	0.0149546	0.000156941	0.0143762
KEGG_PATHWAY	hsa04514:Cell adhesion molecules (CAMs)	12	8.75912	2.8961e-05	ENSG00000150093, ENSG00000138448, ENSG00000144668, ENSG00000077943, ENSG00000162512, ENSG00000139626, ENSG00000163347, ENSG00000115884, ENSG00000105855, ENSG00000091409, ENSG00000142949, ENSG00000169439	96	132	5085	4.81534	0.00228534	0.000254185	0.0307079
GOTERM_BP_FAT	GO:0000904~cell morphogenesis involved in differentiation	12	8.75912	2.14549e-05	ENSG00000153071, ENSG00000069702, ENSG00000115414, ENSG00000105329, ENSG00000182871, ENSG00000169398, ENSG00000154229, ENSG00000092969, ENSG00000141736, ENSG00000136238, ENSG00000019991, ENSG00000091136	130	244	13528	5.11778	0.0374082	0.000349717	0.0363724
GOTERM_BP_FAT	GO:0051240~positive regulation of multicellular organismal process	12	8.75912	2.14549e-05	ENSG00000105974, ENSG00000105329, ENSG00000137801, ENSG00000181104, ENSG00000138685, ENSG00000113905, ENSG00000140416, ENSG00000118785, ENSG00000151694, ENSG00000092969, ENSG00000164171, ENSG00000122194	130	244	13528	5.11778	0.0374082	0.000349717	0.0363724
GOTERM_BP_FAT	GO:0010648~negative regulation of cell communication	12	8.75912	2.49384e-05	ENSG00000105974, ENSG00000101665, ENSG00000179218, ENSG00000140682, ENSG00000137801, ENSG00000106991, ENSG00000123384, ENSG00000146674, ENSG00000196396, ENSG00000154229, ENSG00000173334, ENSG00000142949	130	248	13528	5.03524	0.0433484	0.000395601	0.0422767
GOTERM_BP_FAT	GO:0031399~regulation of protein modification process	12	8.75912	0.000119579	ENSG00000145431, ENSG00000105974, ENSG00000177606, ENSG00000101665, ENSG00000105329, ENSG00000113721, ENSG00000106991, ENSG00000146674, ENSG00000138685, ENSG00000151694, ENSG00000154229, ENSG00000106799	130	295	13528	4.23301	0.191444	0.00147464	0.202563
GOTERM_BP_FAT	GO:0007610~behavior	12	8.75912	0.00521382	ENSG00000177606, ENSG00000011422, ENSG00000077943, ENSG00000122861, ENSG00000113721, ENSG00000106991, ENSG00000138685, ENSG00000142871, ENSG00000161638, ENSG00000154229, ENSG00000092969, ENSG00000136238	130	469	13528	2.66256	0.999908	0.035911	8.48213
GOTERM_MF_FAT	GO:0050840~extracellular matrix binding	11	8.0292	3.48603e-14	ENSG00000109072, ENSG00000137801, ENSG00000005961, ENSG00000116962, ENSG00000163520, ENSG00000168615, ENSG00000142871, ENSG00000118785, ENSG00000113140, ENSG00000091409, ENSG00000164171	126	27	12983	41.9791	1.08418e-11	3.61389e-12	4.68403e-11
GOTERM_CC_FAT	GO:0031091~platelet alpha granule	11	8.0292	2.15808e-10	ENSG00000135218, ENSG00000130402, ENSG00000115414, ENSG00000105329, ENSG00000137801, ENSG00000005961, ENSG00000113905, ENSG00000113140, ENSG00000010278, ENSG00000092969, ENSG00000019991	132	56	12782	19.0208	4.61829e-08	2.71664e-09	2.73488e-07
GOTERM_BP_FAT	GO:0051271~negative regulation of cell motion	11	8.0292	3.64129e-10	ENSG00000130402, ENSG00000069702, ENSG00000101665, ENSG00000139567, ENSG00000105329, ENSG00000137801, ENSG00000146674, ENSG00000138685, ENSG00000140416, ENSG00000173334, ENSG00000122194	130	63	13528	18.1695	6.47056e-07	1.96078e-08	6.1741e-07
GOTERM_BP_FAT	GO:0030198~extracellular matrix organization	11	8.0292	5.3496e-08	ENSG00000100985, ENSG00000139329, ENSG00000109072, ENSG00000077943, ENSG00000106991, ENSG00000182871, ENSG00000116962, ENSG00000169398, ENSG00000142871, ENSG00000092969, ENSG00000106799	130	104	13528	11.0065	9.50579e-05	1.61123e-06	9.07069e-05
GOTERM_CC_FAT	GO:0031252~cell leading edge	11	8.0292	1.47466e-06	ENSG00000145715, ENSG00000150093, ENSG00000077943, ENSG00000169398, ENSG00000089159, ENSG00000140416, ENSG00000161638, ENSG00000151694, ENSG00000115091, ENSG00000136238, ENSG00000137076	132	138	12782	7.7186	0.000315527	1.12705e-05	0.00186878
GOTERM_BP_FAT	GO:0044087~regulation of cellular component biogenesis	11	8.0292	1.00335e-06	ENSG00000145715, ENSG00000105974, ENSG00000139567, ENSG00000137801, ENSG00000169398, ENSG00000140416, ENSG00000157227, ENSG00000154229, ENSG00000115091, ENSG00000106799, ENSG00000136238	130	142	13528	8.06111	0.00178136	2.31549e-05	0.00170125
KEGG_PATHWAY	hsa05222:Small cell lung cancer	11	8.0292	2.83419e-06	ENSG00000005884, ENSG00000150093, ENSG00000115414, ENSG00000138448, ENSG00000005961, ENSG00000101680, ENSG00000169398, ENSG00000053747, ENSG00000091409, ENSG00000164171, ENSG00000091136	96	84	5085	6.93638	0.000223876	2.79873e-05	0.00300552
GOTERM_BP_FAT	GO:0032269~negative regulation of cellular protein metabolic process	11	8.0292	8.49374e-06	ENSG00000105974, ENSG00000177606, ENSG00000138448, ENSG00000101665, ENSG00000179218, ENSG00000105329, ENSG00000137801, ENSG00000106991, ENSG00000146674, ENSG00000123159, ENSG00000154229	130	180	13528	6.35932	0.0149801	0.00015559	0.0144009
GOTERM_BP_FAT	GO:0051248~negative regulation of protein metabolic process	11	8.0292	1.18743e-05	ENSG00000105974, ENSG00000177606, ENSG00000138448, ENSG00000101665, ENSG00000179218, ENSG00000105329, ENSG00000137801, ENSG00000106991, ENSG00000146674, ENSG00000123159, ENSG00000154229	130	187	13528	6.12127	0.0208797	0.000208896	0.0201319
GOTERM_BP_FAT	GO:0007517~muscle organ development	11	8.0292	3.37048e-05	ENSG00000069702, ENSG00000105974, ENSG00000150093, ENSG00000101665, ENSG00000113721, ENSG00000181104, ENSG00000106991, ENSG00000140416, ENSG00000135424, ENSG00000092969, ENSG00000141736	130	211	13528	5.42501	0.058136	0.000525252	0.0571339
GOTERM_BP_FAT	GO:0007507~heart development	11	8.0292	3.95455e-05	ENSG00000149177, ENSG00000163513, ENSG00000069702, ENSG00000150093, ENSG00000101665, ENSG00000106991, ENSG00000164305, ENSG00000140416, ENSG00000092969, ENSG00000106799, ENSG00000141736	130	215	13528	5.32408	0.0678614	0.00060045	0.0670316
GOTERM_BP_FAT	GO:0042493~response to drug	11	8.0292	4.11341e-05	ENSG00000163513, ENSG00000105974, ENSG00000177606, ENSG00000121769, ENSG00000105329, ENSG00000081479, ENSG00000182871, ENSG00000151694, ENSG00000171223, ENSG00000164171, ENSG00000141736	130	216	13528	5.29943	0.0704891	0.000619272	0.0697233
GOTERM_BP_FAT	GO:0045596~negative regulation of cell differentiation	11	8.0292	4.11341e-05	ENSG00000069702, ENSG00000105974, ENSG00000150093, ENSG00000138448, ENSG00000101665, ENSG00000179218, ENSG00000140682, ENSG00000105329, ENSG00000169398, ENSG00000118785, ENSG00000106799	130	216	13528	5.29943	0.0704891	0.000619272	0.0697233
GOTERM_BP_FAT	GO:0051050~positive regulation of transport	11	8.0292	5.38596e-05	ENSG00000130402, ENSG00000105974, ENSG00000179218, ENSG00000105329, ENSG00000181104, ENSG00000135404, ENSG00000168615, ENSG00000154229, ENSG00000092969, ENSG00000164171, ENSG00000106799	130	223	13528	5.13308	0.0912735	0.000759323	0.0912841
GOTERM_BP_FAT	GO:0045597~positive regulation of cell differentiation	11	8.0292	6.73042e-05	ENSG00000135218, ENSG00000163513, ENSG00000177606, ENSG00000140682, ENSG00000105329, ENSG00000146674, ENSG00000138685, ENSG00000171223, ENSG00000115091, ENSG00000092969, ENSG00000142949	130	229	13528	4.99859	0.112728	0.000926731	0.114059
GOTERM_BP_FAT	GO:0032270~positive regulation of cellular protein metabolic process	11	8.0292	7.7773e-05	ENSG00000105974, ENSG00000101665, ENSG00000105329, ENSG00000137801, ENSG00000106991, ENSG00000138685, ENSG00000168615, ENSG00000151694, ENSG00000154229, ENSG00000164171, ENSG00000106799	130	233	13528	4.91278	0.129082	0.00102324	0.131789
GOTERM_BP_FAT	GO:0051247~positive regulation of protein metabolic process	11	8.0292	0.000110173	ENSG00000105974, ENSG00000101665, ENSG00000105329, ENSG00000137801, ENSG00000106991, ENSG00000138685, ENSG00000168615, ENSG00000151694, ENSG00000154229, ENSG00000164171, ENSG00000106799	130	243	13528	4.7106	0.177813	0.0013876	0.186642
GOTERM_BP_FAT	GO:0043066~negative regulation of apoptosis	11	8.0292	0.0020711	ENSG00000145715, ENSG00000137801, ENSG00000181104, ENSG00000164305, ENSG00000167772, ENSG00000151694, ENSG00000198959, ENSG00000197632, ENSG00000106799, ENSG00000141736, ENSG00000019991	130	354	13528	3.23355	0.974882	0.0169117	3.4543
GOTERM_BP_FAT	GO:0034621~cellular macromolecular complex subunit organization	11	8.0292	0.00220254	ENSG00000137309, ENSG00000145431, ENSG00000105974, ENSG00000179218, ENSG00000125482, ENSG00000105329, ENSG00000180370, ENSG00000169398, ENSG00000089159, ENSG00000197122, ENSG00000136238	130	357	13528	3.20638	0.980124	0.0176525	3.66968
GOTERM_BP_FAT	GO:0043069~negative regulation of programmed cell death	11	8.0292	0.00229384	ENSG00000145715, ENSG00000137801, ENSG00000181104, ENSG00000164305, ENSG00000167772, ENSG00000151694, ENSG00000198959, ENSG00000197632, ENSG00000106799, ENSG00000141736, ENSG00000019991	130	359	13528	3.18852	0.983107	0.0181333	3.81903
GOTERM_BP_FAT	GO:0060548~negative regulation of cell death	11	8.0292	0.00234062	ENSG00000145715, ENSG00000137801, ENSG00000181104, ENSG00000164305, ENSG00000167772, ENSG00000151694, ENSG00000198959, ENSG00000197632, ENSG00000106799, ENSG00000141736, ENSG00000019991	130	360	13528	3.17966	0.984457	0.0183372	3.89547
GOTERM_BP_FAT	GO:0016044~membrane organization	11	8.0292	0.00351435	ENSG00000135218, ENSG00000163513, ENSG00000153071, ENSG00000105974, ENSG00000138448, ENSG00000081479, ENSG00000137801, ENSG00000123384, ENSG00000168702, ENSG00000010278, ENSG00000136238	130	381	13528	3.0044	0.998081	0.0258361	5.79469
GOTERM_MF_FAT	GO:0005518~collagen binding	10	7.29927	4.01859e-11	ENSG00000100985, ENSG00000139329, ENSG00000115414, ENSG00000026508, ENSG00000101665, ENSG00000143127, ENSG00000137801, ENSG00000168615, ENSG00000113140, ENSG00000164171	126	36	12983	28.6221	1.24978e-08	2.49957e-09	5.39954e-08
GOTERM_BP_FAT	GO:0010810~regulation of cell-substrate adhesion	10	7.29927	4.02374e-10	ENSG00000135218, ENSG00000145715, ENSG00000139567, ENSG00000109072, ENSG00000137801, ENSG00000116962, ENSG00000163520, ENSG00000142871, ENSG00000118785, ENSG00000157227	130	46	13528	22.6221	7.15018e-07	2.10299e-08	6.82258e-07
GOTERM_BP_FAT	GO:0030336~negative regulation of cell migration	10	7.29927	3.00844e-09	ENSG00000069702, ENSG00000101665, ENSG00000139567, ENSG00000105329, ENSG00000137801, ENSG00000146674, ENSG00000138685, ENSG00000140416, ENSG00000173334, ENSG00000122194	130	57	13528	18.2564	5.34598e-06	1.24325e-07	5.10105e-06
GOTERM_BP_FAT	GO:0007179~transforming growth factor beta receptor signaling pathway	10	7.29927	4.82608e-09	ENSG00000163513, ENSG00000069702, ENSG00000168056, ENSG00000177606, ENSG00000139567, ENSG00000105329, ENSG00000106991, ENSG00000168615, ENSG00000092969, ENSG00000106799	130	60	13528	17.3436	8.57591e-06	1.78666e-07	8.18302e-06
GOTERM_BP_FAT	GO:0040013~negative regulation of locomotion	10	7.29927	5.61618e-09	ENSG00000069702, ENSG00000101665, ENSG00000139567, ENSG00000105329, ENSG00000137801, ENSG00000146674, ENSG00000138685, ENSG00000140416, ENSG00000173334, ENSG00000122194	130	61	13528	17.0593	9.9799e-06	1.99599e-07	9.52269e-06
GOTERM_BP_FAT	GO:0060537~muscle tissue development	10	7.29927	2.96613e-06	ENSG00000069702, ENSG00000105974, ENSG00000150093, ENSG00000101665, ENSG00000113721, ENSG00000181104, ENSG00000106991, ENSG00000140416, ENSG00000092969, ENSG00000141736	130	125	13528	8.32492	0.00525695	6.35018e-05	0.00502919
GOTERM_BP_FAT	GO:0051129~negative regulation of cellular component organization	10	7.29927	8.45636e-06	ENSG00000069702, ENSG00000101665, ENSG00000139567, ENSG00000105329, ENSG00000137801, ENSG00000169398, ENSG00000118785, ENSG00000157227, ENSG00000142949, ENSG00000136238	130	142	13528	7.32828	0.0149147	0.000158167	0.0143375
GOTERM_BP_FAT	GO:0000165~MAPKKK cascade	10	7.29927	6.61069e-05	ENSG00000160691, ENSG00000105974, ENSG00000137801, ENSG00000181104, ENSG00000138685, ENSG00000168615, ENSG00000154229, ENSG00000173334, ENSG00000106799, ENSG00000019991	130	184	13528	5.65552	0.110838	0.000917358	0.112031
GOTERM_BP_FAT	GO:0008361~regulation of cell size	10	7.29927	0.000156596	ENSG00000153071, ENSG00000069702, ENSG00000139567, ENSG00000100852, ENSG00000105329, ENSG00000138685, ENSG00000118785, ENSG00000151694, ENSG00000092969, ENSG00000106799	130	206	13528	5.05153	0.242925	0.00181725	0.26519
KEGG_PATHWAY	hsa04670:Leukocyte transendothelial migration	10	7.29927	0.000316277	ENSG00000100985, ENSG00000130402, ENSG00000087245, ENSG00000150093, ENSG00000100852, ENSG00000163347, ENSG00000169398, ENSG00000089159, ENSG00000154229, ENSG00000136238	96	118	5085	4.48888	0.0246802	0.00192045	0.334892
GOTERM_BP_FAT	GO:0010324~membrane invagination	10	7.29927	0.000256006	ENSG00000135218, ENSG00000163513, ENSG00000153071, ENSG00000105974, ENSG00000138448, ENSG00000081479, ENSG00000137801, ENSG00000123384, ENSG00000168702, ENSG00000136238	130	220	13528	4.73007	0.36554	0.00282198	0.433193
GOTERM_BP_FAT	GO:0006897~endocytosis	10	7.29927	0.000256006	ENSG00000135218, ENSG00000163513, ENSG00000153071, ENSG00000105974, ENSG00000138448, ENSG00000081479, ENSG00000137801, ENSG00000123384, ENSG00000168702, ENSG00000136238	130	220	13528	4.73007	0.36554	0.00282198	0.433193
GOTERM_BP_FAT	GO:0035295~tube development	10	7.29927	0.000256006	ENSG00000163513, ENSG00000026508, ENSG00000136205, ENSG00000128052, ENSG00000106991, ENSG00000118523, ENSG00000138685, ENSG00000142871, ENSG00000157227, ENSG00000106799	130	220	13528	4.73007	0.36554	0.00282198	0.433193
GOTERM_BP_FAT	GO:0060429~epithelium development	10	7.29927	0.000322621	ENSG00000177606, ENSG00000026508, ENSG00000140682, ENSG00000128052, ENSG00000101680, ENSG00000106991, ENSG00000164305, ENSG00000182871, ENSG00000168615, ENSG00000053747	130	227	13528	4.58421	0.436388	0.00342758	0.545624
GOTERM_BP_FAT	GO:0043086~negative regulation of catalytic activity	10	7.29927	0.00133854	ENSG00000105974, ENSG00000101665, ENSG00000180370, ENSG00000106991, ENSG00000164305, ENSG00000167772, ENSG00000132855, ENSG00000154229, ENSG00000173334, ENSG00000092969	130	277	13528	3.75673	0.907467	0.0118304	2.24553
GOTERM_CC_FAT	GO:0048471~perinuclear region of cytoplasm	10	7.29927	0.00284197	ENSG00000130402, ENSG00000115325, ENSG00000105974, ENSG00000100823, ENSG00000179218, ENSG00000180370, ENSG00000118785, ENSG00000164171, ENSG00000141736, ENSG00000091136	132	288	12782	3.36227	0.456131	0.0131529	3.54242
GOTERM_BP_FAT	GO:0044092~negative regulation of molecular function	10	7.29927	0.00469208	ENSG00000105974, ENSG00000101665, ENSG00000180370, ENSG00000106991, ENSG00000164305, ENSG00000167772, ENSG00000132855, ENSG00000154229, ENSG00000173334, ENSG00000092969	130	334	13528	3.11561	0.999765	0.033007	7.66484
GOTERM_BP_FAT	GO:0019226~transmission of nerve impulse	10	7.29927	0.00633009	ENSG00000104368, ENSG00000105329, ENSG00000163347, ENSG00000138685, ENSG00000169398, ENSG00000123159, ENSG00000154229, ENSG00000010278, ENSG00000141736, ENSG00000142949	130	350	13528	2.97319	0.999987	0.0426333	10.2079
GOTERM_BP_FAT	GO:0010769~regulation of cell morphogenesis involved in differentiation	9	6.56934	6.6627e-07	ENSG00000069702, ENSG00000101665, ENSG00000140682, ENSG00000105329, ENSG00000169398, ENSG00000118785, ENSG00000115091, ENSG00000092969, ENSG00000142949	130	77	13528	12.163	0.00118326	1.62185e-05	0.00112971
GOTERM_BP_FAT	GO:0060627~regulation of vesicle-mediated transport	9	6.56934	3.60918e-06	ENSG00000130402, ENSG00000105974, ENSG00000179218, ENSG00000105329, ENSG00000135404, ENSG00000138685, ENSG00000154229, ENSG00000164171, ENSG00000136238	130	96	13528	9.75577	0.006393	7.63486e-05	0.00611949
GOTERM_MF_FAT	GO:0008201~heparin binding	9	6.56934	6.52553e-06	ENSG00000069702, ENSG00000115414, ENSG00000109072, ENSG00000137801, ENSG00000118523, ENSG00000138685, ENSG00000113905, ENSG00000135919, ENSG00000142871	126	103	12983	9.00347	0.00202739	0.00014495	0.0087676
GOTERM_CC_FAT	GO:0016324~apical plasma membrane	9	6.56934	6.58338e-05	ENSG00000105974, ENSG00000115414, ENSG00000026508, ENSG00000081479, ENSG00000175591, ENSG00000169398, ENSG00000151694, ENSG00000106799, ENSG00000141736	132	133	12782	6.55263	0.0139901	0.000414294	0.0833974
KEGG_PATHWAY	hsa04520:Adherens junction	9	6.56934	8.05293e-05	ENSG00000130402, ENSG00000149177, ENSG00000163513, ENSG00000196396, ENSG00000197122, ENSG00000106799, ENSG00000141736, ENSG00000142949, ENSG00000136238	96	77	5085	6.19115	0.00634187	0.000636005	0.0853655
GOTERM_BP_FAT	GO:0030855~epithelial cell differentiation	9	6.56934	4.91043e-05	ENSG00000177606, ENSG00000140682, ENSG00000128052, ENSG00000101680, ENSG00000106991, ENSG00000164305, ENSG00000182871, ENSG00000168615, ENSG00000053747	130	137	13528	6.83616	0.0835616	0.000714994	0.0832277
GOTERM_BP_FAT	GO:0043405~regulation of MAP kinase activity	9	6.56934	6.02457e-05	ENSG00000160691, ENSG00000105974, ENSG00000105329, ENSG00000137801, ENSG00000138685, ENSG00000154229, ENSG00000173334, ENSG00000141736, ENSG00000019991	130	141	13528	6.64223	0.101528	0.000842636	0.102102
KEGG_PATHWAY	hsa05210:Colorectal cancer	9	6.56934	0.000149891	ENSG00000163513, ENSG00000177606, ENSG00000105329, ENSG00000113721, ENSG00000078061, ENSG00000164305, ENSG00000092969, ENSG00000106799, ENSG00000136238	96	84	5085	5.67522	0.0117724	0.00107599	0.15884
KEGG_PATHWAY	hsa04012:ErbB signaling pathway	9	6.56934	0.000191896	ENSG00000158458, ENSG00000160691, ENSG00000177606, ENSG00000078061, ENSG00000180370, ENSG00000169398, ENSG00000197122, ENSG00000154229, ENSG00000141736	96	87	5085	5.47953	0.0150469	0.00126264	0.203312
GOTERM_BP_FAT	GO:0006935~chemotaxis	9	6.56934	0.000145966	ENSG00000011422, ENSG00000122861, ENSG00000113721, ENSG00000106991, ENSG00000138685, ENSG00000142871, ENSG00000154229, ENSG00000092969, ENSG00000136238	130	160	13528	5.85346	0.228486	0.00173943	0.24721
GOTERM_BP_FAT	GO:0042330~taxis	9	6.56934	0.000145966	ENSG00000011422, ENSG00000122861, ENSG00000113721, ENSG00000106991, ENSG00000138685, ENSG00000142871, ENSG00000154229, ENSG00000092969, ENSG00000136238	130	160	13528	5.85346	0.228486	0.00173943	0.24721
GOTERM_MF_FAT	GO:0008083~growth factor activity	9	6.56934	0.000161875	ENSG00000158458, ENSG00000145431, ENSG00000105329, ENSG00000118523, ENSG00000138685, ENSG00000132855, ENSG00000136999, ENSG00000092969, ENSG00000019991	126	161	12983	5.75998	0.0491008	0.0025142	0.217283
GOTERM_BP_FAT	GO:0009991~response to extracellular stimulus	9	6.56934	0.00121824	ENSG00000163513, ENSG00000105974, ENSG00000177606, ENSG00000026508, ENSG00000105329, ENSG00000081479, ENSG00000118785, ENSG00000091409, ENSG00000164171	130	220	13528	4.25706	0.885379	0.0109908	2.04567
GOTERM_BP_FAT	GO:0048584~positive regulation of response to stimulus	9	6.56934	0.00189945	ENSG00000105329, ENSG00000137801, ENSG00000128052, ENSG00000151694, ENSG00000197122, ENSG00000198959, ENSG00000154229, ENSG00000092969, ENSG00000164171	130	236	13528	3.96845	0.965903	0.0157365	3.17233
GOTERM_BP_FAT	GO:0048534~hemopoietic or lymphoid organ development	9	6.56934	0.00345006	ENSG00000100985, ENSG00000163513, ENSG00000069702, ENSG00000150093, ENSG00000105329, ENSG00000128052, ENSG00000151694, ENSG00000092969, ENSG00000106799	130	260	13528	3.60213	0.997848	0.0255801	5.69159
GOTERM_BP_FAT	GO:0007626~locomotory behavior	9	6.56934	0.00472757	ENSG00000011422, ENSG00000122861, ENSG00000113721, ENSG00000106991, ENSG00000138685, ENSG00000142871, ENSG00000154229, ENSG00000092969, ENSG00000136238	130	274	13528	3.41808	0.99978	0.0331223	7.72065
GOTERM_BP_FAT	GO:0016337~cell-cell adhesion	9	6.56934	0.00493632	ENSG00000150093, ENSG00000026508, ENSG00000077943, ENSG00000118523, ENSG00000163347, ENSG00000168615, ENSG00000161638, ENSG00000197122, ENSG00000142949	130	276	13528	3.39331	0.999848	0.0342933	8.04829
GOTERM_BP_FAT	GO:0002520~immune system development	9	6.56934	0.00493632	ENSG00000100985, ENSG00000163513, ENSG00000069702, ENSG00000150093, ENSG00000105329, ENSG00000128052, ENSG00000151694, ENSG00000092969, ENSG00000106799	130	276	13528	3.39331	0.999848	0.0342933	8.04829
GOTERM_CC_FAT	GO:0031093~platelet alpha granule lumen	8	5.83942	1.7008e-07	ENSG00000130402, ENSG00000115414, ENSG00000105329, ENSG00000137801, ENSG00000113905, ENSG00000113140, ENSG00000092969, ENSG00000019991	132	41	12782	18.8943	3.63964e-05	1.65441e-06	0.000215537
GOTERM_CC_FAT	GO:0060205~cytoplasmic membrane-bounded vesicle lumen	8	5.83942	2.82596e-07	ENSG00000130402, ENSG00000115414, ENSG00000105329, ENSG00000137801, ENSG00000113905, ENSG00000113140, ENSG00000092969, ENSG00000019991	132	44	12782	17.6061	6.04737e-05	2.62937e-06	0.000358126
GOTERM_BP_FAT	GO:0001570~vasculogenesis	8	5.83942	1.04511e-07	ENSG00000145715, ENSG00000149177, ENSG00000163513, ENSG00000105974, ENSG00000128052, ENSG00000106991, ENSG00000169398, ENSG00000171223	130	41	13528	20.3047	0.000185699	2.90182e-06	0.000177207
GOTERM_CC_FAT	GO:0031983~vesicle lumen	8	5.83942	3.8806e-07	ENSG00000130402, ENSG00000115414, ENSG00000105329, ENSG00000137801, ENSG00000113905, ENSG00000113140, ENSG00000092969, ENSG00000019991	132	46	12782	16.8406	8.30415e-05	3.32179e-06	0.000491777
GOTERM_BP_FAT	GO:0048771~tissue remodeling	8	5.83942	9.57557e-07	ENSG00000105974, ENSG00000105329, ENSG00000181104, ENSG00000157227, ENSG00000198959, ENSG00000122194, ENSG00000141736, ENSG00000136238	130	56	13528	14.8659	0.00170013	2.26875e-05	0.0016236
GOTERM_BP_FAT	GO:0034330~cell junction organization	8	5.83942	1.08302e-06	ENSG00000115414, ENSG00000101665, ENSG00000105329, ENSG00000161638, ENSG00000010278, ENSG00000092969, ENSG00000091409, ENSG00000137076	130	57	13528	14.6051	0.00192269	2.43609e-05	0.00183634
GOTERM_BP_FAT	GO:0030100~regulation of endocytosis	8	5.83942	1.73154e-06	ENSG00000130402, ENSG00000105974, ENSG00000179218, ENSG00000105329, ENSG00000135404, ENSG00000154229, ENSG00000164171, ENSG00000136238	130	61	13528	13.6474	0.00307223	3.79864e-05	0.00293594
GOTERM_BP_FAT	GO:0050678~regulation of epithelial cell proliferation	8	5.83942	4.87758e-06	ENSG00000069702, ENSG00000105329, ENSG00000128052, ENSG00000101680, ENSG00000138685, ENSG00000092969, ENSG00000141736, ENSG00000091136	130	71	13528	11.7252	0.00863003	9.84893e-05	0.00827002
GOTERM_BP_FAT	GO:0042327~positive regulation of phosphorylation	8	5.83942	3.83827e-05	ENSG00000105974, ENSG00000105329, ENSG00000137801, ENSG00000106991, ENSG00000138685, ENSG00000151694, ENSG00000154229, ENSG00000106799	130	97	13528	8.58239	0.0659333	0.000587822	0.0650611
GOTERM_BP_FAT	GO:0010562~positive regulation of phosphorus metabolic process	8	5.83942	4.67115e-05	ENSG00000105974, ENSG00000105329, ENSG00000137801, ENSG00000106991, ENSG00000138685, ENSG00000151694, ENSG00000154229, ENSG00000106799	130	100	13528	8.32492	0.0796565	0.000691497	0.0791738
GOTERM_BP_FAT	GO:0045937~positive regulation of phosphate metabolic process	8	5.83942	4.67115e-05	ENSG00000105974, ENSG00000105329, ENSG00000137801, ENSG00000106991, ENSG00000138685, ENSG00000151694, ENSG00000154229, ENSG00000106799	130	100	13528	8.32492	0.0796565	0.000691497	0.0791738
GOTERM_BP_FAT	GO:0050817~coagulation	8	5.83942	5.30463e-05	ENSG00000104368, ENSG00000135218, ENSG00000011422, ENSG00000122861, ENSG00000181104, ENSG00000010278, ENSG00000164171, ENSG00000122194	130	102	13528	8.16169	0.0899592	0.000753842	0.0899063
GOTERM_BP_FAT	GO:0007596~blood coagulation	8	5.83942	5.30463e-05	ENSG00000104368, ENSG00000135218, ENSG00000011422, ENSG00000122861, ENSG00000181104, ENSG00000010278, ENSG00000164171, ENSG00000122194	130	102	13528	8.16169	0.0899592	0.000753842	0.0899063
GOTERM_BP_FAT	GO:0007599~hemostasis	8	5.83942	7.63999e-05	ENSG00000104368, ENSG00000135218, ENSG00000011422, ENSG00000122861, ENSG00000181104, ENSG00000010278, ENSG00000164171, ENSG00000122194	130	108	13528	7.70826	0.126955	0.00101268	0.129463
GOTERM_BP_FAT	GO:0007568~aging	8	5.83942	8.58301e-05	ENSG00000177606, ENSG00000179218, ENSG00000105329, ENSG00000081479, ENSG00000106991, ENSG00000123384, ENSG00000154229, ENSG00000106799	130	110	13528	7.56811	0.141464	0.00111271	0.145432
GOTERM_CC_FAT	GO:0044420~extracellular matrix part	8	5.83942	0.000196911	ENSG00000139329, ENSG00000115414, ENSG00000101680, ENSG00000182871, ENSG00000116962, ENSG00000113140, ENSG00000053747, ENSG00000091136	132	117	12782	6.62108	0.0412675	0.00113836	0.249254
GOTERM_BP_FAT	GO:0032147~activation of protein kinase activity	8	5.83942	0.000107544	ENSG00000163513, ENSG00000145431, ENSG00000181104, ENSG00000123384, ENSG00000138685, ENSG00000168615, ENSG00000092969, ENSG00000106799	130	114	13528	7.30256	0.173963	0.00136418	0.182193
GOTERM_BP_FAT	GO:0001503~ossification	8	5.83942	0.000113617	ENSG00000087245, ENSG00000115641, ENSG00000105329, ENSG00000118523, ENSG00000146674, ENSG00000118785, ENSG00000157227, ENSG00000113140	130	115	13528	7.23906	0.182831	0.00142089	0.192473
GOTERM_BP_FAT	GO:0014706~striated muscle tissue development	8	5.83942	0.000140766	ENSG00000069702, ENSG00000105974, ENSG00000150093, ENSG00000101665, ENSG00000181104, ENSG00000140416, ENSG00000092969, ENSG00000141736	130	119	13528	6.99573	0.221323	0.00171195	0.238413
GOTERM_BP_FAT	GO:0014070~response to organic cyclic substance	8	5.83942	0.00015619	ENSG00000163513, ENSG00000177606, ENSG00000026508, ENSG00000105329, ENSG00000154229, ENSG00000171223, ENSG00000164171, ENSG00000106799	130	121	13528	6.8801	0.242378	0.00182446	0.264503
GOTERM_BP_FAT	GO:0060348~bone development	8	5.83942	0.000172956	ENSG00000087245, ENSG00000115641, ENSG00000105329, ENSG00000118523, ENSG00000146674, ENSG00000118785, ENSG00000157227, ENSG00000113140	130	123	13528	6.76823	0.264621	0.00199391	0.292857
GOTERM_CC_FAT	GO:0045121~membrane raft	8	5.83942	0.000666278	ENSG00000163513, ENSG00000105974, ENSG00000181104, ENSG00000151694, ENSG00000197122, ENSG00000154229, ENSG00000132589, ENSG00000141736	132	143	12782	5.41725	0.132926	0.00339022	0.841081
GOTERM_BP_FAT	GO:0050878~regulation of body fluid levels	8	5.83942	0.000399519	ENSG00000104368, ENSG00000135218, ENSG00000011422, ENSG00000122861, ENSG00000181104, ENSG00000010278, ENSG00000164171, ENSG00000122194	130	141	13528	5.9042	0.508398	0.00409613	0.675262
KEGG_PATHWAY	hsa04350:TGF-beta signaling pathway	8	5.83942	0.00109977	ENSG00000163513, ENSG00000049323, ENSG00000101665, ENSG00000139567, ENSG00000105329, ENSG00000137801, ENSG00000092969, ENSG00000106799	96	87	5085	4.87069	0.0832586	0.00577857	1.16013
KEGG_PATHWAY	hsa04640:Hematopoietic cell lineage	8	5.83942	0.00102673	ENSG00000135218, ENSG00000005884, ENSG00000026508, ENSG00000005961, ENSG00000161638, ENSG00000010278, ENSG00000091409, ENSG00000164171	96	86	5085	4.92733	0.0779474	0.00577987	1.08345
GOTERM_BP_FAT	GO:0043623~cellular protein complex assembly	8	5.83942	0.000913598	ENSG00000145431, ENSG00000105974, ENSG00000179218, ENSG00000105329, ENSG00000169398, ENSG00000089159, ENSG00000197122, ENSG00000136238	130	162	13528	5.13884	0.802932	0.00855686	1.53784
GOTERM_BP_FAT	GO:0001701~in utero embryonic development	8	5.83942	0.00147829	ENSG00000153071, ENSG00000069702, ENSG00000150093, ENSG00000139567, ENSG00000113721, ENSG00000140416, ENSG00000171223, ENSG00000106799	130	176	13528	4.73007	0.927839	0.0129298	2.47721
GOTERM_MF_FAT	GO:0004713~protein tyrosine kinase activity	8	5.83942	0.00110992	ENSG00000103653, ENSG00000113721, ENSG00000128052, ENSG00000037280, ENSG00000169398, ENSG00000197122, ENSG00000142627, ENSG00000141736	126	166	12983	4.96577	0.292045	0.0142876	1.48108
GOTERM_BP_FAT	GO:0031401~positive regulation of protein modification process	8	5.83942	0.00208858	ENSG00000105974, ENSG00000101665, ENSG00000105329, ENSG00000106991, ENSG00000138685, ENSG00000151694, ENSG00000154229, ENSG00000106799	130	187	13528	4.45183	0.975652	0.0169754	3.48296
GOTERM_BP_FAT	GO:0051960~regulation of nervous system development	8	5.83942	0.00242334	ENSG00000179218, ENSG00000105329, ENSG00000138685, ENSG00000169398, ENSG00000118785, ENSG00000154229, ENSG00000115091, ENSG00000142949	130	192	13528	4.3359	0.986586	0.0188966	4.03048
GOTERM_BP_FAT	GO:0031667~response to nutrient levels	8	5.83942	0.00279805	ENSG00000163513, ENSG00000105974, ENSG00000177606, ENSG00000026508, ENSG00000105329, ENSG00000081479, ENSG00000118785, ENSG00000164171	130	197	13528	4.22585	0.99312	0.0214156	4.63988
GOTERM_BP_FAT	GO:0010035~response to inorganic substance	8	5.83942	0.00348836	ENSG00000105974, ENSG00000177606, ENSG00000137801, ENSG00000115884, ENSG00000089159, ENSG00000168615, ENSG00000140416, ENSG00000154229	130	205	13528	4.06094	0.99799	0.0257535	5.75302
GOTERM_BP_FAT	GO:0006605~protein targeting	8	5.83942	0.00452577	ENSG00000177606, ENSG00000179218, ENSG00000105329, ENSG00000167004, ENSG00000181104, ENSG00000138685, ENSG00000123159, ENSG00000092969	130	215	13528	3.87206	0.999684	0.0322354	7.40289
GOTERM_MF_FAT	GO:0046982~protein heterodimerization activity	8	5.83942	0.00396939	ENSG00000163513, ENSG00000150093, ENSG00000105329, ENSG00000092969, ENSG00000164171, ENSG00000106799, ENSG00000141736, ENSG00000019991	126	208	12983	3.96306	0.709728	0.0357266	5.20375
GOTERM_CC_FAT	GO:0044463~cell projection part	8	5.83942	0.0103455	ENSG00000150093, ENSG00000081479, ENSG00000077943, ENSG00000140416, ENSG00000161638, ENSG00000151694, ENSG00000123159, ENSG00000164171	132	234	12782	3.31054	0.891983	0.0426982	12.3474
GOTERM_BP_FAT	GO:0030097~hemopoiesis	8	5.83942	0.00744615	ENSG00000100985, ENSG00000163513, ENSG00000069702, ENSG00000150093, ENSG00000105329, ENSG00000128052, ENSG00000151694, ENSG00000092969	130	236	13528	3.52751	0.999998	0.0490635	11.9027
GOTERM_MF_FAT	GO:0050431~transforming growth factor beta binding	7	5.10949	1.43657e-10	ENSG00000135218, ENSG00000163513, ENSG00000069702, ENSG00000139567, ENSG00000137801, ENSG00000106991, ENSG00000106799	126	10	12983	72.1278	4.46774e-08	7.44624e-09	1.93023e-07
GOTERM_MF_FAT	GO:0005160~transforming growth factor beta receptor binding	7	5.10949	8.01154e-09	ENSG00000163513, ENSG00000069702, ENSG00000101665, ENSG00000105329, ENSG00000106991, ENSG00000092969, ENSG00000106799	126	17	12983	42.4281	2.49159e-06	3.11449e-07	1.07646e-05
GOTERM_BP_FAT	GO:0010811~positive regulation of cell-substrate adhesion	7	5.10949	2.12188e-07	ENSG00000135218, ENSG00000109072, ENSG00000137801, ENSG00000116962, ENSG00000163520, ENSG00000142871, ENSG00000118785	130	28	13528	26.0154	0.000376987	5.54495e-06	0.000359781
GOTERM_BP_FAT	GO:0001933~negative regulation of protein amino acid phosphorylation	7	5.10949	4.94691e-07	ENSG00000105974, ENSG00000177606, ENSG00000101665, ENSG00000105329, ENSG00000106991, ENSG00000146674, ENSG00000154229	130	32	13528	22.7635	0.000878681	1.23811e-05	0.000838787
GOTERM_BP_FAT	GO:0017015~regulation of transforming growth factor beta receptor signaling pathway	7	5.10949	1.68639e-06	ENSG00000140682, ENSG00000105329, ENSG00000077943, ENSG00000137801, ENSG00000106991, ENSG00000151694, ENSG00000123159	130	39	13528	18.6777	0.00299222	3.74582e-05	0.00285937
GOTERM_BP_FAT	GO:0042326~negative regulation of phosphorylation	7	5.10949	4.01757e-06	ENSG00000105974, ENSG00000177606, ENSG00000101665, ENSG00000105329, ENSG00000106991, ENSG00000146674, ENSG00000154229	130	45	13528	16.1874	0.00711381	8.39875e-05	0.0068119
GOTERM_BP_FAT	GO:0048660~regulation of smooth muscle cell proliferation	7	5.10949	4.58433e-06	ENSG00000163513, ENSG00000177606, ENSG00000146674, ENSG00000198959, ENSG00000154229, ENSG00000173334, ENSG00000164171	130	46	13528	15.8355	0.00811328	9.36321e-05	0.00777283
GOTERM_BP_FAT	GO:0010563~negative regulation of phosphorus metabolic process	7	5.10949	5.91306e-06	ENSG00000105974, ENSG00000177606, ENSG00000101665, ENSG00000105329, ENSG00000106991, ENSG00000146674, ENSG00000154229	130	48	13528	15.1756	0.0104525	0.000114206	0.0100256
GOTERM_BP_FAT	GO:0045936~negative regulation of phosphate metabolic process	7	5.10949	5.91306e-06	ENSG00000105974, ENSG00000177606, ENSG00000101665, ENSG00000105329, ENSG00000106991, ENSG00000146674, ENSG00000154229	130	48	13528	15.1756	0.0104525	0.000114206	0.0100256
GOTERM_MF_FAT	GO:0046332~SMAD binding	7	5.10949	4.8261e-06	ENSG00000163513, ENSG00000069702, ENSG00000177606, ENSG00000101665, ENSG00000140682, ENSG00000139567, ENSG00000106799	126	46	12983	15.68	0.0014998	0.000115449	0.00648434
GOTERM_BP_FAT	GO:0009612~response to mechanical stimulus	7	5.10949	1.46998e-05	ENSG00000163513, ENSG00000105974, ENSG00000177606, ENSG00000157227, ENSG00000154229, ENSG00000171223, ENSG00000164171	130	56	13528	13.0077	0.0257835	0.000253577	0.0249218
GOTERM_BP_FAT	GO:0032103~positive regulation of response to external stimulus	7	5.10949	3.18951e-05	ENSG00000105329, ENSG00000137801, ENSG00000128052, ENSG00000151694, ENSG00000198959, ENSG00000154229, ENSG00000164171	130	64	13528	11.3817	0.0551022	0.000501454	0.054067
GOTERM_CC_FAT	GO:0005604~basement membrane	7	5.10949	0.000145056	ENSG00000115414, ENSG00000101680, ENSG00000182871, ENSG00000116962, ENSG00000113140, ENSG00000053747, ENSG00000091136	132	78	12782	8.69017	0.0305674	0.000861971	0.183671
GOTERM_BP_FAT	GO:0001763~morphogenesis of a branching structure	7	5.10949	7.29135e-05	ENSG00000163513, ENSG00000026508, ENSG00000105329, ENSG00000128052, ENSG00000106991, ENSG00000142871, ENSG00000157227	130	74	13528	9.84366	0.121529	0.000981125	0.123559
GOTERM_BP_FAT	GO:0001934~positive regulation of protein amino acid phosphorylation	7	5.10949	0.000203581	ENSG00000105974, ENSG00000105329, ENSG00000106991, ENSG00000138685, ENSG00000151694, ENSG00000154229, ENSG00000106799	130	89	13528	8.18462	0.303578	0.00228725	0.344628
GOTERM_BP_FAT	GO:0031344~regulation of cell projection organization	7	5.10949	0.000203581	ENSG00000169398, ENSG00000118785, ENSG00000115091, ENSG00000164171, ENSG00000106799, ENSG00000142949, ENSG00000136238	130	89	13528	8.18462	0.303578	0.00228725	0.344628
GOTERM_BP_FAT	GO:0030324~lung development	7	5.10949	0.000363282	ENSG00000163513, ENSG00000136205, ENSG00000128052, ENSG00000118523, ENSG00000138685, ENSG00000157227, ENSG00000106799	130	99	13528	7.35789	0.475689	0.00379086	0.614193
GOTERM_BP_FAT	GO:0030323~respiratory tube development	7	5.10949	0.000426534	ENSG00000163513, ENSG00000136205, ENSG00000128052, ENSG00000118523, ENSG00000138685, ENSG00000157227, ENSG00000106799	130	102	13528	7.14148	0.53145	0.00434749	0.720768
GOTERM_BP_FAT	GO:0060541~respiratory system development	7	5.10949	0.000578637	ENSG00000163513, ENSG00000136205, ENSG00000128052, ENSG00000118523, ENSG00000138685, ENSG00000157227, ENSG00000106799	130	108	13528	6.74473	0.64247	0.00572953	0.97661
GOTERM_BP_FAT	GO:0045926~negative regulation of growth	7	5.10949	0.000637729	ENSG00000153071, ENSG00000139567, ENSG00000105329, ENSG00000138685, ENSG00000169398, ENSG00000118785, ENSG00000092969	130	110	13528	6.6221	0.678129	0.00620924	1.07584
GOTERM_BP_FAT	GO:0007565~female pregnancy	7	5.10949	0.000637729	ENSG00000163513, ENSG00000105329, ENSG00000122861, ENSG00000118785, ENSG00000171223, ENSG00000106799, ENSG00000091136	130	110	13528	6.6221	0.678129	0.00620924	1.07584
GOTERM_MF_FAT	GO:0004222~metalloendopeptidase activity	7	5.10949	0.00049638	ENSG00000100985, ENSG00000087245, ENSG00000137673, ENSG00000008516, ENSG00000168615, ENSG00000151694, ENSG00000157227	126	104	12983	6.93536	0.143082	0.00732601	0.6649
GOTERM_BP_FAT	GO:0032844~regulation of homeostatic process	7	5.10949	0.000769884	ENSG00000105974, ENSG00000026508, ENSG00000101665, ENSG00000105329, ENSG00000181104, ENSG00000118785, ENSG00000151694	130	114	13528	6.38974	0.74554	0.00733112	1.29742
KEGG_PATHWAY	hsa05211:Renal cell carcinoma	7	5.10949	0.00181649	ENSG00000177606, ENSG00000105329, ENSG00000078061, ENSG00000180370, ENSG00000092969, ENSG00000136238, ENSG00000019991	96	70	5085	5.29688	0.133795	0.00841341	1.90961
GOTERM_BP_FAT	GO:0031400~negative regulation of protein modification process	7	5.10949	0.00096378	ENSG00000105974, ENSG00000177606, ENSG00000101665, ENSG00000105329, ENSG00000106991, ENSG00000146674, ENSG00000154229	130	119	13528	6.12127	0.819759	0.00893089	1.62166
GOTERM_MF_FAT	GO:0019955~cytokine binding	7	5.10949	0.000637101	ENSG00000135218, ENSG00000163513, ENSG00000069702, ENSG00000139567, ENSG00000137801, ENSG00000106991, ENSG00000106799	126	109	12983	6.61723	0.179796	0.00896871	0.852651
KEGG_PATHWAY	hsa05212:Pancreatic cancer	7	5.10949	0.00210077	ENSG00000163513, ENSG00000105329, ENSG00000078061, ENSG00000092969, ENSG00000106799, ENSG00000141736, ENSG00000136238	96	72	5085	5.14974	0.153069	0.00918729	2.20546
GOTERM_BP_FAT	GO:0042391~regulation of membrane potential	7	5.10949	0.00177569	ENSG00000105974, ENSG00000177606, ENSG00000101665, ENSG00000105329, ENSG00000163347, ENSG00000010278, ENSG00000141736	130	134	13528	5.43605	0.957498	0.0149974	2.96855
GOTERM_BP_FAT	GO:0045165~cell fate commitment	7	5.10949	0.00213743	ENSG00000150093, ENSG00000140682, ENSG00000128052, ENSG00000164305, ENSG00000138685, ENSG00000092969, ENSG00000106799	130	139	13528	5.24051	0.97768	0.0172121	3.56303
GOTERM_BP_FAT	GO:0007584~response to nutrient	7	5.10949	0.002216	ENSG00000163513, ENSG00000105974, ENSG00000026508, ENSG00000105329, ENSG00000081479, ENSG00000118785, ENSG00000164171	130	140	13528	5.20308	0.980594	0.0176798	3.69171
GOTERM_BP_FAT	GO:0006913~nucleocytoplasmic transport	7	5.10949	0.00379303	ENSG00000177606, ENSG00000179218, ENSG00000105329, ENSG00000167004, ENSG00000181104, ENSG00000138685, ENSG00000092969	130	156	13528	4.66943	0.998833	0.027632	6.24042
GOTERM_BP_FAT	GO:0051169~nuclear transport	7	5.10949	0.00403692	ENSG00000177606, ENSG00000179218, ENSG00000105329, ENSG00000167004, ENSG00000181104, ENSG00000138685, ENSG00000092969	130	158	13528	4.61032	0.999244	0.0291475	6.62885
GOTERM_BP_FAT	GO:0006979~response to oxidative stress	7	5.10949	0.00483846	ENSG00000177606, ENSG00000115884, ENSG00000089159, ENSG00000168615, ENSG00000140416, ENSG00000157227, ENSG00000154229	130	164	13528	4.44165	0.999819	0.033755	7.89484
GOTERM_BP_FAT	GO:0051241~negative regulation of multicellular organismal process	7	5.10949	0.00483846	ENSG00000163513, ENSG00000105974, ENSG00000122861, ENSG00000137801, ENSG00000151694, ENSG00000154229, ENSG00000122194	130	164	13528	4.44165	0.999819	0.033755	7.89484
GOTERM_MF_FAT	GO:0004721~phosphoprotein phosphatase activity	7	5.10949	0.00520577	ENSG00000149177, ENSG00000162407, ENSG00000101224, ENSG00000196396, ENSG00000138032, ENSG00000127947, ENSG00000142949	126	165	12983	4.37138	0.802738	0.0418169	6.77269
GOTERM_BP_FAT	GO:0048729~tissue morphogenesis	7	5.10949	0.00754443	ENSG00000069702, ENSG00000026508, ENSG00000101665, ENSG00000140682, ENSG00000101680, ENSG00000140416, ENSG00000092969	130	180	13528	4.04684	0.999999	0.0495143	12.0505
GOTERM_BP_FAT	GO:0060389~pathway-restricted SMAD protein phosphorylation	6	4.37956	5.47588e-08	ENSG00000163513, ENSG00000069702, ENSG00000101665, ENSG00000105329, ENSG00000092969, ENSG00000106799	130	12	13528	52.0308	9.73017e-05	1.62177e-06	9.2848e-05
GOTERM_MF_FAT	GO:0004675~transmembrane receptor protein serine/threonine kinase activity	6	4.37956	5.91685e-07	ENSG00000163513, ENSG00000069702, ENSG00000049323, ENSG00000139567, ENSG00000106991, ENSG00000106799	126	18	12983	34.3466	0.000183997	1.53344e-05	0.000795008
GOTERM_MF_FAT	GO:0005024~transforming growth factor beta receptor activity	6	4.37956	5.91685e-07	ENSG00000163513, ENSG00000069702, ENSG00000049323, ENSG00000139567, ENSG00000106991, ENSG00000106799	126	18	12983	34.3466	0.000183997	1.53344e-05	0.000795008
GOTERM_BP_FAT	GO:0032570~response to progesterone stimulus	6	4.37956	1.00825e-06	ENSG00000105974, ENSG00000105329, ENSG00000137801, ENSG00000171223, ENSG00000092969, ENSG00000141736	130	20	13528	31.2185	0.00179005	2.29697e-05	0.00170955
GOTERM_BP_FAT	GO:0050921~positive regulation of chemotaxis	6	4.37956	7.20916e-06	ENSG00000105329, ENSG00000137801, ENSG00000128052, ENSG00000151694, ENSG00000154229, ENSG00000164171	130	29	13528	21.53	0.012729	0.00013774	0.012223
GOTERM_BP_FAT	GO:0050920~regulation of chemotaxis	6	4.37956	1.01582e-05	ENSG00000105329, ENSG00000137801, ENSG00000128052, ENSG00000151694, ENSG00000154229, ENSG00000164171	130	31	13528	20.1409	0.0178893	0.00018418	0.0172227
GOTERM_BP_FAT	GO:0048520~positive regulation of behavior	6	4.37956	1.62589e-05	ENSG00000105329, ENSG00000137801, ENSG00000128052, ENSG00000151694, ENSG00000154229, ENSG00000164171	130	34	13528	18.3638	0.0284789	0.000272532	0.0275647
GOTERM_BP_FAT	GO:0030193~regulation of blood coagulation	6	4.37956	2.16944e-05	ENSG00000105974, ENSG00000122861, ENSG00000137801, ENSG00000181104, ENSG00000113905, ENSG00000122194	130	36	13528	17.3436	0.0378178	0.000350406	0.0367783
GOTERM_BP_FAT	GO:0050818~regulation of coagulation	6	4.37956	4.15109e-05	ENSG00000105974, ENSG00000122861, ENSG00000137801, ENSG00000181104, ENSG00000113905, ENSG00000122194	130	41	13528	15.2285	0.0711113	0.000619693	0.0703618
GOTERM_BP_FAT	GO:0050679~positive regulation of epithelial cell proliferation	6	4.37956	4.15109e-05	ENSG00000105329, ENSG00000128052, ENSG00000101680, ENSG00000138685, ENSG00000141736, ENSG00000091136	130	41	13528	15.2285	0.0711113	0.000619693	0.0703618
GOTERM_BP_FAT	GO:0034329~cell junction assembly	6	4.37956	4.15109e-05	ENSG00000115414, ENSG00000101665, ENSG00000161638, ENSG00000010278, ENSG00000091409, ENSG00000137076	130	41	13528	15.2285	0.0711113	0.000619693	0.0703618
GOTERM_BP_FAT	GO:0050795~regulation of behavior	6	4.37956	7.30898e-05	ENSG00000105329, ENSG00000137801, ENSG00000128052, ENSG00000151694, ENSG00000154229, ENSG00000164171	130	46	13528	13.5732	0.121804	0.000976105	0.123858
GOTERM_BP_FAT	GO:0030162~regulation of proteolysis	6	4.37956	0.000145072	ENSG00000101665, ENSG00000011422, ENSG00000137801, ENSG00000135919, ENSG00000168615, ENSG00000123159	130	53	13528	11.7806	0.227259	0.00174045	0.245697
GOTERM_CC_FAT	GO:0031253~cell projection membrane	6	4.37956	0.000528755	ENSG00000150093, ENSG00000081479, ENSG00000077943, ENSG00000140416, ENSG00000161638, ENSG00000151694	132	65	12782	8.93846	0.107013	0.00282559	0.668013
GOTERM_CC_FAT	GO:0001726~ruffle	6	4.37956	0.000608225	ENSG00000145715, ENSG00000150093, ENSG00000140416, ENSG00000161638, ENSG00000151694, ENSG00000137076	132	67	12782	8.67164	0.12208	0.00317057	0.768057
GOTERM_BP_FAT	GO:0006275~regulation of DNA replication	6	4.37956	0.000305492	ENSG00000160691, ENSG00000145431, ENSG00000177606, ENSG00000179218, ENSG00000125482, ENSG00000105329	130	62	13528	10.0705	0.418964	0.0032654	0.516727
GOTERM_BP_FAT	GO:0045765~regulation of angiogenesis	6	4.37956	0.000329316	ENSG00000137801, ENSG00000167772, ENSG00000138685, ENSG00000132855, ENSG00000122194, ENSG00000141736	130	63	13528	9.91062	0.443057	0.00345727	0.556919
GOTERM_BP_FAT	GO:0048754~branching morphogenesis of a tube	6	4.37956	0.00038116	ENSG00000163513, ENSG00000026508, ENSG00000128052, ENSG00000106991, ENSG00000142871, ENSG00000157227	130	65	13528	9.60568	0.492089	0.00393091	0.644326
GOTERM_BP_FAT	GO:0031099~regeneration	6	4.37956	0.000503101	ENSG00000011422, ENSG00000105329, ENSG00000081479, ENSG00000122861, ENSG00000106799, ENSG00000122194	130	69	13528	9.04883	0.59108	0.005068	0.849635
GOTERM_BP_FAT	GO:0006937~regulation of muscle contraction	6	4.37956	0.000612251	ENSG00000105974, ENSG00000101665, ENSG00000181104, ENSG00000140416, ENSG00000154229, ENSG00000164171	130	72	13528	8.67179	0.663212	0.00602788	1.03307
GOTERM_BP_FAT	GO:0000302~response to reactive oxygen species	6	4.37956	0.000738264	ENSG00000177606, ENSG00000115884, ENSG00000089159, ENSG00000168615, ENSG00000140416, ENSG00000154229	130	75	13528	8.32492	0.730821	0.00706884	1.24444
GOTERM_BP_FAT	GO:0034097~response to cytokine stimulus	6	4.37956	0.000935257	ENSG00000177606, ENSG00000164305, ENSG00000168615, ENSG00000197122, ENSG00000154229, ENSG00000171223	130	79	13528	7.90341	0.810379	0.00871303	1.57403
GOTERM_BP_FAT	GO:0031960~response to corticosteroid stimulus	6	4.37956	0.00130076	ENSG00000105974, ENSG00000115884, ENSG00000168615, ENSG00000197122, ENSG00000154229, ENSG00000171223	130	85	13528	7.34552	0.901031	0.0116722	2.1828
GOTERM_BP_FAT	GO:0006606~protein import into nucleus	6	4.37956	0.00137064	ENSG00000177606, ENSG00000105329, ENSG00000167004, ENSG00000181104, ENSG00000138685, ENSG00000092969	130	86	13528	7.26011	0.912604	0.0120527	2.2988
GOTERM_BP_FAT	GO:0051170~nuclear import	6	4.37956	0.00151868	ENSG00000177606, ENSG00000105329, ENSG00000167004, ENSG00000181104, ENSG00000138685, ENSG00000092969	130	88	13528	7.0951	0.932845	0.0131517	2.54408
GOTERM_BP_FAT	GO:0043523~regulation of neuron apoptosis	6	4.37956	0.00167817	ENSG00000145715, ENSG00000177606, ENSG00000181104, ENSG00000168615, ENSG00000092969, ENSG00000142949	130	90	13528	6.93744	0.949441	0.0143149	2.80769
GOTERM_BP_FAT	GO:0030308~negative regulation of cell growth	6	4.37956	0.00184963	ENSG00000153071, ENSG00000139567, ENSG00000105329, ENSG00000138685, ENSG00000118785, ENSG00000092969	130	92	13528	6.78662	0.96274	0.0154707	3.09034
GOTERM_MF_FAT	GO:0005201~extracellular matrix structural constituent	6	4.37956	0.00142714	ENSG00000139329, ENSG00000115414, ENSG00000101680, ENSG00000182871, ENSG00000163520, ENSG00000091136	126	86	12983	7.18882	0.358636	0.0163157	1.90064
GOTERM_BP_FAT	GO:0034504~protein localization in nucleus	6	4.37956	0.00203358	ENSG00000177606, ENSG00000105329, ENSG00000167004, ENSG00000181104, ENSG00000138685, ENSG00000092969	130	94	13528	6.64223	0.973146	0.0166842	3.39273
GOTERM_BP_FAT	GO:0001822~kidney development	6	4.37956	0.00223057	ENSG00000026508, ENSG00000077943, ENSG00000113721, ENSG00000116962, ENSG00000115884, ENSG00000106799	130	96	13528	6.50385	0.981091	0.0177157	3.71555
GOTERM_BP_FAT	GO:0045792~negative regulation of cell size	6	4.37956	0.00255163	ENSG00000153071, ENSG00000139567, ENSG00000105329, ENSG00000138685, ENSG00000118785, ENSG00000092969	130	99	13528	6.30676	0.989327	0.0197155	4.23954
GOTERM_BP_FAT	GO:0048585~negative regulation of response to stimulus	6	4.37956	0.00266574	ENSG00000105329, ENSG00000196396, ENSG00000118785, ENSG00000154229, ENSG00000092969, ENSG00000142949	130	100	13528	6.24369	0.991291	0.0205003	4.42513
GOTERM_BP_FAT	GO:0043406~positive regulation of MAP kinase activity	6	4.37956	0.00290501	ENSG00000160691, ENSG00000105329, ENSG00000137801, ENSG00000138685, ENSG00000141736, ENSG00000019991	130	102	13528	6.12127	0.994314	0.0220368	4.81316
GOTERM_BP_FAT	GO:0043627~response to estrogen stimulus	6	4.37956	0.0032925	ENSG00000163513, ENSG00000105974, ENSG00000105329, ENSG00000157227, ENSG00000154229, ENSG00000106799	130	105	13528	5.94637	0.99715	0.0246296	5.43844
GOTERM_BP_FAT	GO:0007265~Ras protein signal transduction	6	4.37956	0.0032925	ENSG00000115325, ENSG00000160691, ENSG00000154016, ENSG00000100852, ENSG00000138685, ENSG00000197122	130	105	13528	5.94637	0.99715	0.0246296	5.43844
GOTERM_BP_FAT	GO:0060249~anatomical structure homeostasis	6	4.37956	0.00342956	ENSG00000113721, ENSG00000181104, ENSG00000128052, ENSG00000164171, ENSG00000122194, ENSG00000136238	130	106	13528	5.89028	0.997768	0.0255361	5.65869
GOTERM_BP_FAT	GO:0001655~urogenital system development	6	4.37956	0.00401906	ENSG00000026508, ENSG00000077943, ENSG00000113721, ENSG00000116962, ENSG00000115884, ENSG00000106799	130	110	13528	5.67608	0.99922	0.0291384	6.60046
GOTERM_BP_FAT	GO:0048705~skeletal system morphogenesis	6	4.37956	0.0043395	ENSG00000163513, ENSG00000087245, ENSG00000105329, ENSG00000113721, ENSG00000118523, ENSG00000106799	130	112	13528	5.57473	0.99956	0.0310508	7.10867
KEGG_PATHWAY	hsa05120:Epithelial cell signaling in Helicobacter pylori infection	6	4.37956	0.00844082	ENSG00000103653, ENSG00000177606, ENSG00000164305, ENSG00000151694, ENSG00000197122, ENSG00000136238	96	68	5085	4.67371	0.488115	0.0329284	8.597
GOTERM_BP_FAT	GO:0051052~regulation of DNA metabolic process	6	4.37956	0.00467777	ENSG00000160691, ENSG00000145431, ENSG00000177606, ENSG00000179218, ENSG00000125482, ENSG00000105329	130	114	13528	5.47692	0.999759	0.0331698	7.64234
GOTERM_BP_FAT	GO:0051101~regulation of DNA binding	6	4.37956	0.00600976	ENSG00000069702, ENSG00000100823, ENSG00000101665, ENSG00000105329, ENSG00000173334, ENSG00000164171	130	121	13528	5.16008	0.999978	0.0408226	9.71581
GOTERM_BP_FAT	GO:0042692~muscle cell differentiation	6	4.37956	0.00600976	ENSG00000150093, ENSG00000181104, ENSG00000115884, ENSG00000140416, ENSG00000122194, ENSG00000141736	130	121	13528	5.16008	0.999978	0.0408226	9.71581
KEGG_PATHWAY	hsa04370:VEGF signaling pathway	6	4.37956	0.0126212	ENSG00000128052, ENSG00000169398, ENSG00000089159, ENSG00000197122, ENSG00000154229, ENSG00000136238	96	75	5085	4.2375	0.633378	0.0466585	12.6018
KEGG_PATHWAY	hsa05220:Chronic myeloid leukemia	6	4.37956	0.0126212	ENSG00000163513, ENSG00000160691, ENSG00000105329, ENSG00000078061, ENSG00000092969, ENSG00000106799	96	75	5085	4.2375	0.633378	0.0466585	12.6018
GOTERM_BP_FAT	GO:0035239~tube morphogenesis	6	4.37956	0.00734736	ENSG00000163513, ENSG00000026508, ENSG00000128052, ENSG00000106991, ENSG00000142871, ENSG00000157227	130	127	13528	4.91629	0.999998	0.0487868	11.7539
GOTERM_MF_FAT	GO:0005114~type II transforming growth factor beta receptor binding	5	3.64964	1.21028e-07	ENSG00000069702, ENSG00000105329, ENSG00000106991, ENSG00000092969, ENSG00000106799	126	6	12983	85.8664	3.76391e-05	3.76397e-06	0.000162618
GOTERM_BP_FAT	GO:0033627~cell adhesion mediated by integrin	5	3.64964	2.70167e-07	ENSG00000150093, ENSG00000168615, ENSG00000161638, ENSG00000151694, ENSG00000091409	130	7	13528	74.3297	0.000479972	6.95777e-06	0.00045809
GOTERM_BP_FAT	GO:0010717~regulation of epithelial to mesenchymal transition	5	3.64964	9.58285e-07	ENSG00000069702, ENSG00000101665, ENSG00000140682, ENSG00000105329, ENSG00000092969	130	9	13528	57.812	0.00170142	2.2406e-05	0.00162484
GOTERM_BP_FAT	GO:0030511~positive regulation of transforming growth factor beta receptor signaling pathway	5	3.64964	5.27908e-06	ENSG00000140682, ENSG00000077943, ENSG00000137801, ENSG00000151694, ENSG00000123159	130	13	13528	40.0237	0.00933709	0.000105398	0.00895074
GOTERM_BP_FAT	GO:0010596~negative regulation of endothelial cell migration	5	3.64964	7.33619e-06	ENSG00000139567, ENSG00000105329, ENSG00000137801, ENSG00000138685, ENSG00000122194	130	14	13528	37.1648	0.0129519	0.000138676	0.0124384
GOTERM_BP_FAT	GO:0033993~response to lipid	5	3.64964	2.17722e-05	ENSG00000163513, ENSG00000069702, ENSG00000121769, ENSG00000105329, ENSG00000106799	130	18	13528	28.906	0.0379508	0.000348495	0.0369102
GOTERM_CC_FAT	GO:0031256~leading edge membrane	5	3.64964	8.02235e-05	ENSG00000150093, ENSG00000077943, ENSG00000140416, ENSG00000161638, ENSG00000151694	132	23	12782	21.0507	0.017022	0.000490409	0.101618
GOTERM_BP_FAT	GO:0010594~regulation of endothelial cell migration	5	3.64964	8.54686e-05	ENSG00000139567, ENSG00000105329, ENSG00000137801, ENSG00000138685, ENSG00000122194	130	25	13528	20.8123	0.140912	0.00111617	0.14482
GOTERM_BP_FAT	GO:0001952~regulation of cell-matrix adhesion	5	3.64964	0.000116838	ENSG00000135218, ENSG00000145715, ENSG00000139567, ENSG00000137801, ENSG00000157227	130	27	13528	19.2707	0.187494	0.00145092	0.197923
GOTERM_BP_FAT	GO:0045807~positive regulation of endocytosis	5	3.64964	0.000155804	ENSG00000130402, ENSG00000105974, ENSG00000179218, ENSG00000135404, ENSG00000164171	130	29	13528	17.9416	0.241859	0.001832	0.263851
GOTERM_BP_FAT	GO:0007566~embryo implantation	5	3.64964	0.000178453	ENSG00000163513, ENSG00000122861, ENSG00000118785, ENSG00000106799, ENSG00000091136	130	30	13528	17.3436	0.271771	0.00203088	0.302152
GOTERM_BP_FAT	GO:0048661~positive regulation of smooth muscle cell proliferation	5	3.64964	0.000203386	ENSG00000163513, ENSG00000177606, ENSG00000198959, ENSG00000154229, ENSG00000164171	130	31	13528	16.7841	0.303337	0.00229961	0.344299
GOTERM_BP_FAT	GO:0000060~protein import into nucleus, translocation	5	3.64964	0.000293216	ENSG00000177606, ENSG00000105329, ENSG00000181104, ENSG00000138685, ENSG00000092969	130	34	13528	15.3032	0.406145	0.00315332	0.49601
GOTERM_BP_FAT	GO:0045216~cell-cell junction organization	5	3.64964	0.000328621	ENSG00000101665, ENSG00000105329, ENSG00000010278, ENSG00000092969, ENSG00000137076	130	35	13528	14.8659	0.442368	0.00347048	0.555745
GOTERM_BP_FAT	GO:0007162~negative regulation of cell adhesion	5	3.64964	0.000730283	ENSG00000145715, ENSG00000139567, ENSG00000105329, ENSG00000137801, ENSG00000157227	130	43	13528	12.1002	0.726974	0.00706881	1.23107
GOTERM_BP_FAT	GO:0031346~positive regulation of cell projection organization	5	3.64964	0.00102493	ENSG00000115091, ENSG00000164171, ENSG00000106799, ENSG00000142949, ENSG00000136238	130	47	13528	11.0704	0.838336	0.00944591	1.72372
GOTERM_CC_FAT	GO:0005901~caveola	5	3.64964	0.00195	ENSG00000163513, ENSG00000105974, ENSG00000181104, ENSG00000197122, ENSG00000132589	132	52	12782	9.3109	0.341445	0.0096671	2.44325
GOTERM_BP_FAT	GO:0010721~negative regulation of cell development	5	3.64964	0.00110993	ENSG00000069702, ENSG00000101665, ENSG00000105329, ENSG00000169398, ENSG00000118785	130	48	13528	10.8397	0.861022	0.0101208	1.86541
GOTERM_BP_FAT	GO:0055002~striated muscle cell development	5	3.64964	0.00149964	ENSG00000150093, ENSG00000181104, ENSG00000115884, ENSG00000140416, ENSG00000141736	130	52	13528	10.0059	0.93053	0.0130513	2.51257
GOTERM_BP_FAT	GO:0006898~receptor-mediated endocytosis	5	3.64964	0.00161022	ENSG00000163513, ENSG00000153071, ENSG00000081479, ENSG00000123384, ENSG00000168702	130	53	13528	9.81713	0.942941	0.013872	2.69546
GOTERM_BP_FAT	GO:0042476~odontogenesis	5	3.64964	0.00172634	ENSG00000105329, ENSG00000115884, ENSG00000092969, ENSG00000091409, ENSG00000091136	130	54	13528	9.63533	0.953596	0.0146529	2.88719
GOTERM_BP_FAT	GO:0051054~positive regulation of DNA metabolic process	5	3.64964	0.0019758	ENSG00000160691, ENSG00000145431, ENSG00000177606, ENSG00000179218, ENSG00000105329	130	56	13528	9.29121	0.970237	0.0162887	3.29785
GOTERM_BP_FAT	GO:0055001~muscle cell development	5	3.64964	0.0019758	ENSG00000150093, ENSG00000181104, ENSG00000115884, ENSG00000140416, ENSG00000141736	130	56	13528	9.29121	0.970237	0.0162887	3.29785
GOTERM_BP_FAT	GO:0048738~cardiac muscle tissue development	5	3.64964	0.00210943	ENSG00000069702, ENSG00000150093, ENSG00000101665, ENSG00000140416, ENSG00000092969	130	57	13528	9.12821	0.976539	0.0170656	3.51714
GOTERM_BP_FAT	GO:0001894~tissue homeostasis	5	3.64964	0.00304442	ENSG00000113721, ENSG00000181104, ENSG00000128052, ENSG00000164171, ENSG00000136238	130	63	13528	8.25885	0.995565	0.0229857	5.03857
GOTERM_BP_FAT	GO:0033273~response to vitamin	5	3.64964	0.00360375	ENSG00000026508, ENSG00000105329, ENSG00000081479, ENSG00000118785, ENSG00000164171	130	66	13528	7.88345	0.998364	0.0263769	5.93789
GOTERM_BP_FAT	GO:0010720~positive regulation of cell development	5	3.64964	0.0042291	ENSG00000140682, ENSG00000105329, ENSG00000115091, ENSG00000092969, ENSG00000142949	130	69	13528	7.54069	0.999464	0.0303935	6.93387
KEGG_PATHWAY	hsa05219:Bladder cancer	5	3.64964	0.00743603	ENSG00000100985, ENSG00000087245, ENSG00000137801, ENSG00000078061, ENSG00000141736	96	42	5085	6.3058	0.445474	0.0305572	7.60998
GOTERM_BP_FAT	GO:0003007~heart morphogenesis	5	3.64964	0.00517155	ENSG00000069702, ENSG00000101665, ENSG00000106991, ENSG00000140416, ENSG00000092969	130	73	13528	7.1275	0.9999	0.0357626	8.41617
GOTERM_MF_FAT	GO:0004714~transmembrane receptor protein tyrosine kinase activity	5	3.64964	0.00393223	ENSG00000113721, ENSG00000128052, ENSG00000037280, ENSG00000142627, ENSG00000141736	126	67	12983	7.68953	0.70634	0.0364504	5.15622
GOTERM_BP_FAT	GO:0051384~response to glucocorticoid stimulus	5	3.64964	0.00653526	ENSG00000105974, ENSG00000115884, ENSG00000168615, ENSG00000154229, ENSG00000171223	130	78	13528	6.67061	0.999991	0.0438234	10.5217
GOTERM_BP_FAT	GO:0043277~apoptotic cell clearance	4	2.91971	1.65919e-05	ENSG00000135218, ENSG00000138448, ENSG00000137801, ENSG00000123384	130	6	13528	69.3744	0.0290537	0.000275515	0.0281293
GOTERM_BP_FAT	GO:0043537~negative regulation of blood vessel endothelial cell migration	4	2.91971	6.8238e-05	ENSG00000105329, ENSG00000137801, ENSG00000138685, ENSG00000122194	130	9	13528	46.2496	0.114199	0.000932358	0.11564
GOTERM_CC_FAT	GO:0032587~ruffle membrane	4	2.91971	0.000216327	ENSG00000150093, ENSG00000140416, ENSG00000161638, ENSG00000151694	132	12	12782	32.2778	0.0452436	0.00121765	0.2738
GOTERM_BP_FAT	GO:0001953~negative regulation of cell-matrix adhesion	4	2.91971	9.68035e-05	ENSG00000145715, ENSG00000139567, ENSG00000137801, ENSG00000157227	130	10	13528	41.6246	0.158044	0.0012458	0.164012
GOTERM_BP_FAT	GO:0030194~positive regulation of blood coagulation	4	2.91971	9.68035e-05	ENSG00000137801, ENSG00000181104, ENSG00000113905, ENSG00000122194	130	10	13528	41.6246	0.158044	0.0012458	0.164012
GOTERM_BP_FAT	GO:0010812~negative regulation of cell-substrate adhesion	4	2.91971	0.000132177	ENSG00000145715, ENSG00000139567, ENSG00000137801, ENSG00000157227	130	11	13528	37.8406	0.209346	0.00161865	0.223882
GOTERM_BP_FAT	GO:0008354~germ cell migration	4	2.91971	0.000175009	ENSG00000150093, ENSG00000105329, ENSG00000162407, ENSG00000106799	130	12	13528	34.6872	0.2673	0.00200456	0.296329
GOTERM_MF_FAT	GO:0043236~laminin binding	4	2.91971	0.000135879	ENSG00000137801, ENSG00000168615, ENSG00000091409, ENSG00000164171	126	11	12983	37.469	0.0413808	0.0023451	0.182418
GOTERM_BP_FAT	GO:0050820~positive regulation of coagulation	4	2.91971	0.000225928	ENSG00000137801, ENSG00000181104, ENSG00000113905, ENSG00000122194	130	13	13528	32.0189	0.330698	0.0025221	0.38239
GOTERM_BP_FAT	GO:0048844~artery morphogenesis	4	2.91971	0.000285544	ENSG00000101665, ENSG00000106991, ENSG00000132855, ENSG00000106799	130	14	13528	29.7319	0.397992	0.00308964	0.483063
GOTERM_BP_FAT	GO:0022612~gland morphogenesis	4	2.91971	0.000433211	ENSG00000105974, ENSG00000105329, ENSG00000092969, ENSG00000141736	130	16	13528	26.0154	0.536979	0.00439023	0.732011
GOTERM_BP_FAT	GO:0043535~regulation of blood vessel endothelial cell migration	4	2.91971	0.000433211	ENSG00000105329, ENSG00000137801, ENSG00000138685, ENSG00000122194	130	16	13528	26.0154	0.536979	0.00439023	0.732011
GOTERM_BP_FAT	GO:0060393~regulation of pathway-restricted SMAD protein phosphorylation	4	2.91971	0.000522386	ENSG00000101665, ENSG00000105329, ENSG00000106991, ENSG00000106799	130	17	13528	24.4851	0.604863	0.00523215	0.882067
GOTERM_BP_FAT	GO:0001837~epithelial to mesenchymal transition	4	2.91971	0.000622509	ENSG00000069702, ENSG00000105329, ENSG00000092969, ENSG00000019991	130	18	13528	23.1248	0.6693	0.00609485	1.05029
GOTERM_BP_FAT	GO:0046626~regulation of insulin receptor signaling pathway	4	2.91971	0.000734096	ENSG00000196396, ENSG00000197122, ENSG00000154229, ENSG00000142949	130	19	13528	21.9077	0.728819	0.00706713	1.23746
GOTERM_BP_FAT	GO:0048008~platelet-derived growth factor receptor signaling pathway	4	2.91971	0.000734096	ENSG00000104368, ENSG00000145431, ENSG00000113721, ENSG00000197122	130	19	13528	21.9077	0.728819	0.00706713	1.23746
GOTERM_BP_FAT	GO:0007044~cell-substrate junction assembly	4	2.91971	0.00130484	ENSG00000115414, ENSG00000161638, ENSG00000091409, ENSG00000137076	130	23	13528	18.0977	0.901747	0.0116499	2.18958
GOTERM_BP_FAT	GO:0000186~activation of MAPKK activity	4	2.91971	0.0016712	ENSG00000181104, ENSG00000138685, ENSG00000168615, ENSG00000106799	130	25	13528	16.6498	0.94881	0.0143246	2.79619
GOTERM_BP_FAT	GO:0045766~positive regulation of angiogenesis	4	2.91971	0.0018761	ENSG00000137801, ENSG00000167772, ENSG00000138685, ENSG00000132855	130	26	13528	16.0095	0.964455	0.0156172	3.13392
GOTERM_BP_FAT	GO:0007173~epidermal growth factor receptor signaling pathway	4	2.91971	0.0023313	ENSG00000160691, ENSG00000105329, ENSG00000151694, ENSG00000197122	130	28	13528	14.8659	0.984197	0.0183455	3.88023
GOTERM_BP_FAT	GO:0045740~positive regulation of DNA replication	4	2.91971	0.0023313	ENSG00000160691, ENSG00000145431, ENSG00000177606, ENSG00000179218	130	28	13528	14.8659	0.984197	0.0183455	3.88023
GOTERM_MF_FAT	GO:0005520~insulin-like growth factor binding	4	2.91971	0.00171651	ENSG00000118523, ENSG00000146674, ENSG00000142871, ENSG00000136999	126	25	12983	16.4863	0.413917	0.018901	2.28191
GOTERM_BP_FAT	GO:0045768~positive regulation of anti-apoptosis	4	2.91971	0.00284941	ENSG00000145715, ENSG00000105974, ENSG00000101665, ENSG00000123384	130	30	13528	13.8749	0.993722	0.0217116	4.72313
GOTERM_BP_FAT	GO:0030510~regulation of BMP signaling pathway	4	2.91971	0.00284941	ENSG00000105974, ENSG00000101665, ENSG00000139567, ENSG00000106991	130	30	13528	13.8749	0.993722	0.0217116	4.72313
GOTERM_MF_FAT	GO:0005158~insulin receptor binding	4	2.91971	0.00239406	ENSG00000115325, ENSG00000160691, ENSG00000196396, ENSG00000142949	126	28	12983	14.72	0.525477	0.0237598	3.1693
GOTERM_BP_FAT	GO:0042552~myelination	4	2.91971	0.0056017	ENSG00000105329, ENSG00000163347, ENSG00000010278, ENSG00000141736	130	38	13528	10.9538	0.999954	0.0382426	9.0853
GOTERM_BP_FAT	GO:0045767~regulation of anti-apoptosis	4	2.91971	0.0056017	ENSG00000145715, ENSG00000105974, ENSG00000101665, ENSG00000123384	130	38	13528	10.9538	0.999954	0.0382426	9.0853
GOTERM_MF_FAT	GO:0008034~lipoprotein binding	4	2.91971	0.00455461	ENSG00000135218, ENSG00000137801, ENSG00000123384, ENSG00000168702	126	35	12983	11.776	0.758218	0.0386691	5.9494
GOTERM_BP_FAT	GO:0060326~cell chemotaxis	4	2.91971	0.00602674	ENSG00000113721, ENSG00000106991, ENSG00000154229, ENSG00000092969	130	39	13528	10.673	0.999978	0.0407805	9.74196
GOTERM_BP_FAT	GO:0051781~positive regulation of cell division	4	2.91971	0.00602674	ENSG00000145431, ENSG00000105329, ENSG00000138685, ENSG00000092969	130	39	13528	10.673	0.999978	0.0407805	9.74196
GOTERM_BP_FAT	GO:0007272~ensheathment of neurons	4	2.91971	0.00741541	ENSG00000105329, ENSG00000163347, ENSG00000010278, ENSG00000141736	130	42	13528	9.91062	0.999998	0.0490464	11.8564
GOTERM_BP_FAT	GO:0008366~axon ensheathment	4	2.91971	0.00741541	ENSG00000105329, ENSG00000163347, ENSG00000010278, ENSG00000141736	130	42	13528	9.91062	0.999998	0.0490464	11.8564
GOTERM_CC_FAT	GO:0070022~transforming growth factor beta receptor complex	3	2.18978	0.000310627	ENSG00000163513, ENSG00000106991, ENSG00000106799	132	3	12782	96.8333	0.0643227	0.00170328	0.392937
GOTERM_BP_FAT	GO:0070723~response to cholesterol	3	2.18978	0.000534643	ENSG00000163513, ENSG00000105329, ENSG00000106799	130	4	13528	78.0462	0.613381	0.00532462	0.902675
GOTERM_BP_FAT	GO:0033631~cell-cell adhesion mediated by integrin	3	2.18978	0.000534643	ENSG00000150093, ENSG00000168615, ENSG00000161638	130	4	13528	78.0462	0.613381	0.00532462	0.902675
GOTERM_BP_FAT	GO:0051895~negative regulation of focal adhesion formation	3	2.18978	0.000885502	ENSG00000139567, ENSG00000137801, ENSG00000157227	130	5	13528	62.4369	0.792834	0.00833862	1.49088
GOTERM_BP_FAT	GO:0002246~healing during inflammatory response	3	2.18978	0.000885502	ENSG00000026508, ENSG00000105329, ENSG00000181104	130	5	13528	62.4369	0.792834	0.00833862	1.49088
GOTERM_CC_FAT	GO:0005606~laminin-1 complex	3	2.18978	0.00211657	ENSG00000101680, ENSG00000053747, ENSG00000091136	132	7	12782	41.5	0.364552	0.0102522	2.64938
GOTERM_BP_FAT	GO:0051918~negative regulation of fibrinolysis	3	2.18978	0.00131996	ENSG00000137801, ENSG00000113905, ENSG00000122194	130	6	13528	52.0308	0.904355	0.0117253	2.21468
GOTERM_BP_FAT	GO:0010632~regulation of epithelial cell migration	3	2.18978	0.00183641	ENSG00000069702, ENSG00000092969, ENSG00000164171	130	7	13528	44.5978	0.961852	0.0154334	3.06857
GOTERM_BP_FAT	GO:0010770~positive regulation of cell morphogenesis involved in differentiation	3	2.18978	0.00183641	ENSG00000140682, ENSG00000105329, ENSG00000092969	130	7	13528	44.5978	0.961852	0.0154334	3.06857
GOTERM_BP_FAT	GO:0010718~positive regulation of epithelial to mesenchymal transition	3	2.18978	0.00183641	ENSG00000140682, ENSG00000105329, ENSG00000092969	130	7	13528	44.5978	0.961852	0.0154334	3.06857
GOTERM_CC_FAT	GO:0043256~laminin complex	3	2.18978	0.00357994	ENSG00000101680, ENSG00000053747, ENSG00000091136	132	9	12782	32.2778	0.53582	0.0161968	4.44317
GOTERM_BP_FAT	GO:0032967~positive regulation of collagen biosynthetic process	3	2.18978	0.00243327	ENSG00000105329, ENSG00000181104, ENSG00000164171	130	8	13528	39.0231	0.986822	0.0188906	4.04668
GOTERM_BP_FAT	GO:0007184~SMAD protein nuclear translocation	3	2.18978	0.00243327	ENSG00000177606, ENSG00000105329, ENSG00000092969	130	8	13528	39.0231	0.986822	0.0188906	4.04668
GOTERM_BP_FAT	GO:0035313~wound healing, spreading of epidermal cells	3	2.18978	0.00243327	ENSG00000139567, ENSG00000161638, ENSG00000151694	130	8	13528	39.0231	0.986822	0.0188906	4.04668
GOTERM_BP_FAT	GO:0010714~positive regulation of collagen metabolic process	3	2.18978	0.00243327	ENSG00000105329, ENSG00000181104, ENSG00000164171	130	8	13528	39.0231	0.986822	0.0188906	4.04668
GOTERM_BP_FAT	GO:0051893~regulation of focal adhesion formation	3	2.18978	0.00243327	ENSG00000139567, ENSG00000137801, ENSG00000157227	130	8	13528	39.0231	0.986822	0.0188906	4.04668
GOTERM_CC_FAT	GO:0031092~platelet alpha granule membrane	3	2.18978	0.00444498	ENSG00000135218, ENSG00000005961, ENSG00000010278	132	10	12782	29.05	0.614551	0.0196654	5.48916
GOTERM_MF_FAT	GO:0034713~type I transforming growth factor beta receptor binding	3	2.18978	0.00187109	ENSG00000163513, ENSG00000101665, ENSG00000106991	126	7	12983	44.1599	0.441474	0.0198842	2.48502
GOTERM_BP_FAT	GO:0051917~regulation of fibrinolysis	3	2.18978	0.003109	ENSG00000137801, ENSG00000113905, ENSG00000122194	130	9	13528	34.6872	0.996047	0.0233692	5.14281
GOTERM_BP_FAT	GO:0043536~positive regulation of blood vessel endothelial cell migration	3	2.18978	0.003109	ENSG00000105329, ENSG00000137801, ENSG00000138685	130	9	13528	34.6872	0.996047	0.0233692	5.14281
GOTERM_MF_FAT	GO:0005021~vascular endothelial growth factor receptor activity	3	2.18978	0.00247908	ENSG00000113721, ENSG00000128052, ENSG00000037280	126	8	12983	38.6399	0.53789	0.0238349	3.28012
GOTERM_BP_FAT	GO:0032965~regulation of collagen biosynthetic process	3	2.18978	0.0046909	ENSG00000105329, ENSG00000181104, ENSG00000164171	130	11	13528	28.3804	0.999765	0.0331297	7.663
GOTERM_BP_FAT	GO:0048010~vascular endothelial growth factor receptor signaling pathway	3	2.18978	0.0046909	ENSG00000113721, ENSG00000128052, ENSG00000037280	130	11	13528	28.3804	0.999765	0.0331297	7.663
GOTERM_BP_FAT	GO:0010712~regulation of collagen metabolic process	3	2.18978	0.00559408	ENSG00000105329, ENSG00000181104, ENSG00000164171	130	12	13528	26.0154	0.999953	0.0383383	9.07349
GOTERM_BP_FAT	GO:0014910~regulation of smooth muscle cell migration	3	2.18978	0.00559408	ENSG00000146674, ENSG00000173334, ENSG00000164171	130	12	13528	26.0154	0.999953	0.0383383	9.07349
GOTERM_MF_FAT	GO:0048185~activin binding	3	2.18978	0.0047784	ENSG00000101665, ENSG00000139567, ENSG00000106991	126	11	12983	28.1017	0.774547	0.0394609	6.2331
GOTERM_BP_FAT	GO:0010595~positive regulation of endothelial cell migration	3	2.18978	0.00657011	ENSG00000105329, ENSG00000137801, ENSG00000138685	130	13	13528	24.0142	0.999992	0.0438875	10.5749
GOTERM_BP_FAT	GO:0044253~positive regulation of multicellular organismal metabolic process	3	2.18978	0.00657011	ENSG00000105329, ENSG00000181104, ENSG00000164171	130	13	13528	24.0142	0.999992	0.0438875	10.5749
GOTERM_BP_FAT	GO:0010862~positive regulation of pathway-restricted SMAD protein phosphorylation	3	2.18978	0.00761754	ENSG00000105329, ENSG00000106991, ENSG00000106799	130	14	13528	22.2989	0.999999	0.0498006	12.1602
GOTERM_BP_FAT	GO:0033135~regulation of peptidyl-serine phosphorylation	3	2.18978	0.00761754	ENSG00000105974, ENSG00000101665, ENSG00000105329	130	14	13528	22.2989	0.999999	0.0498006	12.1602
